# Supplementary material for: The next generation of target capture technologies - large DNA fragment enrichment and sequencing determines regional genomic variation of high complexity
Source: PubMed Central journal article supplement (PMC4938946; doi:10.1186/s12864-016-2836-6), 2016-07-09
Supplement: 12864_2016_2836_MOESM1_ESM.pdf [file 12864_2016_2836_MOESM1_ESM.pdf]

| Primer ID        | Start    | End      | Distance | Sequence                            | GC%  | TM   | Size | Self dG | Hairpin Tm | Hairpin dG |
|------------------|----------|----------|----------|-------------------------------------|------|------|------|---------|------------|------------|
| MHC_1b_29730938  | 29730938 | 29730963 | 4136     | TGAGGCAGTTGAGGGCATGAAAGTA           | 48   | 58   | 25   | -5.4    | 30.4       | -0.43      |
| MHC_2_29735074   | 29735074 | 29735099 | 7493     | GGGCAGTTCAGAGTGATAGGCCAA            | 52.0 | 58.0 | 25   | -3.5    | 16.6       | 0.61       |
| MHC_3_29742567   | 29742567 | 29742592 | 7705     | GCCTTCTCCTCCTACCAAGTGTCTC           | 56.0 | 58.1 | 25   | -3.5    | 17.5       | 0.36       |
| MHC_4_29750272   | 29750272 | 29750297 | 9109     | CCCATAGACAATCCACAGACACCCA           | 52.0 | 58.0 | 25   | -1.6    | 0.8        | 0.96       |
| MHC_5_29759382   | 29759382 | 29759406 | 7498     | CGCAGAAAATTACAGAGACGCACA            | 45.8 | 56.3 | 24   | -5.4    | 19.6       | 0.39       |
| MHC_6_29766876   | 29766876 | 29766904 | 6617     | TGTGCTGTATAGTCTTCCATTTGAGAA         | 35.7 | 54.0 | 28   | -4.0    | 32.3       | -0.67      |
| MHC_7_29773495   | 29773495 | 29773521 | 8990     | ACAAGCAATACTCTCTGATTTGAAGG          | 38.5 | 53.7 | 26   | -3.9    | 27.2       | -0.2       |
| MHC_8r_29782486  | 29782486 | 29782511 | 8579     | CCC AAT CCT CTT TCC TGC TGT TGA T   | 48.0 | 57.0 | 25   | -3.9    | 18.4       | 0.57       |
| MHC_9_29791065   | 29791065 | 29791090 | 8085     | TCCCGTTTCTCTCCACCTATTCTCT           | 48.0 | 56.5 | 25   | -3.6    | -6         | 1.86       |
| MHC_10_29799150  | 29799150 | 29799175 | 5705     | AGTTCCCAGGTTCTAAAGTCCCACG           | 52.0 | 58.2 | 25   | -3.6    | 20.6       | 0.32       |
| MHC_11r_29804855 | 29804855 | 29804880 | 9503     | TGCTGGCTCACAAATGGCTTATGTTT          | 44.0 | 57.7 | 25   | -3.3    | 23.7       | 0.09       |
| MHC_12_29814358  | 29814358 | 29814383 | 8964     | CTTCAGTCAGGACACAGGACAGAGT           | 52.0 | 57.7 | 25   | -2.9    | 34.5       | -0.86      |
| MHC_13_29823322  | 29823322 | 29823347 | 7741     | CTTTGGTTAGGGTGAGGACAGGAGG           | 56.0 | 58.2 | 25   | -2.0    | 22         | 0.16       |
| MHC_14r_29831063 | 29831063 | 29831088 | 7567     | TCTCAACCCAAAGACACCATGACGG           | 52.0 | 58.9 | 25   | -5.4    | 34.2       | -0.5       |
| MHC_15_29838630  | 29838630 | 29838655 | 5718     | CAACTGGAGAAGCTGTTAGGTCCCA           | 52.0 | 58.2 | 25   | -6.3    | 23.8       | 0.07       |
| MHC_16_29844349  | 29844349 | 29844373 | 7037     | GTCAGTGGCTATGTGTGAGAGTCTC           | 58.5 | 52   | 25   | -4.8    | 37.1       | -1.06      |
| MHC_17_29851390  | 29851390 | 29851410 | 11241    | CAACACCCAAGGCTCTGTGA                | 55.0 | 54.3 | 20   | -3.3    | 38.5       | -1.21      |
| MHC_18_29862627  | 29862627 | 29862651 | 7754     | TTCTCCTAAGCACCCAAGGCTCTG            | 54.2 | 58.2 | 24   | -4.7    | 31.6       | -0.44      |
| MHC_19_29870379  | 29870379 | 29870405 | 8626     | CTTGCTGTTTCCAACCTTTTCTCTCT          | 46.2 | 57.3 | 26   | -3.9    | 28.9       | -0.32      |
| MHC_20_29879006  | 29879006 | 29879031 | 11626    | ACCACATACTTGAGACCCAGGACAC           | 52.0 | 57.9 | 25   | -3.1    | 29.7       | -0.31      |
| MHC_21b_29890632 | 29890632 | 29890657 | 4427     | AATCAGCACGCAATTCCAACCTCAC           | 48   | 58   | 25   | -5.4    | -49.5      | 1.91       |
| MHC_22r_29895059 | 29895059 | 29895084 | 7713     | TGTTACGGTGCCATATACTCTTTGT           |      |      |      |         |            |            |
| MHC_23_29902772  | 29902772 | 29902797 | 6374     | ACACGGAAACTTAGGGCTACGGAAT           | 48.0 | 58.0 | 25   | -3.6    | 28.7       | -0.28      |
| MHC_24b_29909146 | 29909146 | 29909171 | 11250    | ACA GGG GTG GTG GAA GTA GGA TAG T   | 52   | 58   | 25   | -2      | 10.7       | 0.91       |
| MHC_25_29920396  | 29920396 | 29920421 | 6569     | TTCTCTGATGTCACCTCAGCCAC             | 52.0 | 58.0 | 25   | -5.1    | 31.8       | -0.71      |
| MHC_26r_29926965 | 29926965 | 29926990 | 8514     | AGGCTCACAGGACAACCAAGTAAAGA          | 48.0 | 57.6 | 25   | -3.1    | 30         | -0.26      |
| MHC_27r_29935477 | 29935477 | 29935504 | 7853     | GCA ACT TCT TCT GAT GCT TTA TGG GCT | 44.4 | 58.0 | 27   | -5.1    | 32.1       | -0.55      |
| MHC_28_29943334  | 29943334 | 29943357 | 7392     | CACCCACACAGCAGAGAGATGC              | 56.5 | 57.9 | 23   | -5.1    | 33.7       | -0.68      |
| MHC_29_29950724  | 29950724 | 29950749 | 12284    | ATGTGATTGGGCTGTAAGTAAGCAT           | 40.0 | 54.8 | 25   | -4.7    | 38.8       | -1.3       |
| MHC_30_29963009  | 29963009 | 29963033 | 3494     | AGCTCACTCTGTGCACCAAACCTCC           | 52   | 58.2 | 25   | -6.3    | 10.2       | 0.63       |
| MHC_31_29966502  | 29966502 | 29966527 | 6821     | GCACCTGAATGTGTCTGTGTTCTCTG          | 52.0 | 58.3 | 25   | -3.5    | 33.5       | -0.76      |
| MHC_32_29973323  | 29973323 | 29973348 | 9400     | AAAGGAGTCAGCTATGCTCAGGCTT           | 48.0 | 58.0 | 25   | -6.3    | 38.3       | -1.08      |
| MHC_33r_29982723 | 29982723 | 29982748 | 6622     | AGGTGCCCATGACAGGATTGAAGAC           | 52.0 | 58.7 | 25   | -5.4    | 27.4       | -0.32      |
| MHC_34_29989346  | 29989346 | 29989370 | 7038     | CGAAAGGGCAGATACCGTGGAAATG           | 54.2 | 57.9 | 24   | -3.6    | 16.9       | 0.5        |
| MHC_35_29996383  | 29996383 | 29996408 | 8869     | ACCCAAGGCTGTGCATGTCTCAAA            | 48.0 | 58.1 | 25   | -5.4    | 26.1       | -0.09      |
| MHC_36_30005253  | 30005253 | 30005277 | 7186     | ACCTGAATGTGCCTGTGTTCTCTGTA          | 48   | 58   | 25   | -3.5    | 19.6       | 0.49       |
| MHC_37r_30012438 | 30012438 | 30012463 | 9609     | CTGCTACCCAGTCATCCTCCAGAAG           | 56.0 | 58.1 | 25   | -3.6    | 33         | -0.59      |
| MHC_38_30022048  | 30022048 | 30022072 | 9886     | TACTCTTCTTCTGCTCTGAGTTGT            | 44   | 57.2 | 25   | -4.5    | 34.8       | -1.13      |
| MHC_39r_30031933 | 30031933 | 30031958 | 4817     | ATCTTATAGCCCTGAGTTTGTGTGCG          | 46   | 57   | 26   | -3.6    | 11.6       | 0.91       |
| MHC_40_30036750  | 30036750 | 30036775 | 9650     | AGAGGTATTGGCGTATTATCAGAGT           | 40.0 | 53.2 | 25   | -3.6    | 8.5        | 1.21       |
| MHC_41_30046400  | 30046400 | 30046425 | 7824     | TGGAATGGCTGGTCATCAACTCTGA           | 48.0 | 57.9 | 25   | -3.5    | 23.4       | 0.11       |
| MHC_42_30054224  | 30054224 | 30054249 | 8487     | GCCACACACCCAAATAGTTACAGGA           | 48.0 | 57.0 | 25   | -3.1    | 26.6       | -0.08      |
| MHC_43r_30062226 | 30062211 | 30062736 | 8389     | CTG GAT TGC CCT GTA ACC CCA CAT T   | 48.0 | 57.3 | 25   | -5.4    | 23.5       | 0.13       |
| MHC_44_30071100  | 30071100 | 30071125 | 9956     | GCCTAGAAGACACCAAGAGTTCGCT           | 52.0 | 58.5 | 25   | -4.2    | 10.1       | 0.58       |
| MHC_45_30081057  | 30081057 | 30081081 | 5177     | TGAGTGATAAGAGGGACGGAGGGAA           | 52   | 58   | 25   | -3.6    | -3.9       | 1.77       |
| MHC_46_30086232  | 30086232 | 30086258 | 8536     | GTTGGAAAATTGACCCACAAGGCTA           | 46.2 | 57.8 | 26   | -5.4    | 34         | -0.5       |
| MHC_47_30094770  | 30094769 | 30094794 | 4909     | GTGTACTCCCAGCCACAATCCTAT            | 52.0 | 57.8 | 25   | -3.6    | 13.8       | 0.66       |
| MHC_48r_30099679 | 30099679 | 30099703 | 11849    | GGCTCCCTCCATGTATCTCCAGTAC           |      |      |      |         |            |            |

|                  |          |          |       |                                   |      |      |    |      |      |       |
|------------------|----------|----------|-------|-----------------------------------|------|------|----|------|------|-------|
| MHC_49_30111527  | 30111527 | 30111552 | 6905  | ATCTCCTGGTTATCTGCTTTCATGG         | 44.0 | 54.7 | 25 | -5.4 | 3.4  | 1.1   |
| MHC_50r_30118432 | 30118432 | 30118457 | 11071 | TTCTCACAAATGCTGTTCTCGCCTC         | 48.0 | 57.8 | 25 | -3.6 | 29.2 | -0.25 |
| MHC_51r_30129503 | 30129503 | 30129528 | 4915  | CTG AGT TTG GAA ATG GCA GAG TGG G | 52.0 | 58.0 | 25 | -3.9 | 18.8 | 0.48  |
| MHC_52_30134418  | 30134418 | 30134443 | 7791  | CCCTCTGCTTGCCTGACTAACAATG         | 52.0 | 57.9 | 25 | -3.9 | 16.4 | 0.52  |
| MHC_53_30142209  | 30142209 | 30142234 | 8196  | TGCTTCATCCTACTCATCACCCCAG         | 52.0 | 57.8 | 25 | -3.1 | -6.1 | 1.72  |
| MHC_54_30150405  | 30150405 | 30150430 | 5213  | CCCTTCCCTCCATCCTCTTGTCAGTC        | 56.0 | 58.1 | 25 | -2.0 | 10.5 | 0.93  |
| MHC_55r_30155619 | 30155619 | 30155643 | 10736 | TCT TTG GGA AGG GCA TAG TGA GTG G | 52   | 58   | 25 | -3.5 | 33.7 | -0.67 |
| MHC_56_30166355  | 30166355 | 30166379 | 8045  | CCCATTGCACCTTTGCCTATTCCAC         | 52   | 58   | 25 | -7   | 41.3 | -1.4  |
| MHC_57_30174399  | 30174399 | 30174424 | 8064  | TATGTTCTCGCTTTTCCCTGTGGGTGA       | 48.0 | 57.9 | 25 | -3.6 | 30.4 | -0.37 |
| MHC_58_30182463  | 30182463 | 30182488 | 8146  | AGTCTCCCCAACTCCAAACCTGATG         | 52.0 | 58.2 | 25 | -2.9 | 19.5 | 0.34  |
| MHC_59_30190610  | 30190610 | 30190634 | 8722  | GGCAACCCAGCAGAGAGAATGAAA          | 50.0 | 57.4 | 24 | -3.1 | 36   | -0.8  |
| MHC_60r_30199332 | 30199332 | 30199356 | 7418  | AGGCTTATCTCTCATTCCCACCCAC         |      |      |    |      |      |       |
| MHC_61_30206749  | 30206749 | 30206774 | 8005  | ACACAGTTTTATGCTCCCCTTCCCT         | 48.0 | 57.8 | 25 | -3.1 | 13.7 | 0.72  |
| MHC_62_30214754  | 30214754 | 30214779 | 8320  | GCCGATGAAGCAGCATAAGATGGAG         | 52.0 | 58.1 | 25 | -3.6 | 29   | -0.3  |
| MHC_63_30223074  | 30223074 | 30223099 | 7677  | TGGTGACTTGTGGTAGATGTGGCTT         | 48.0 | 58.1 | 25 | -3.1 | 25   | 0.04  |
| MHC_64r_30230751 | 30230751 | 30230776 | 7463  | ACTGAGGCAGAGTGAATAACCCAGG         |      |      |    |      |      |       |
| MHC_65c_30238214 | 30238214 | 30238239 | 8204  | AAGAGCAGAGATTGGATGGGAAGGG         | 52.0 | 58.0 | 25 | -3.1 | 23.5 | 0.05  |
| MHC_66_30246418  | 30246418 | 30246443 | 4853  | CTCCTGTCTTCCACCCATCTCCATC         | 56.0 | 58.1 | 25 | -2.0 | 12.8 | 0.74  |
| MHC_67_30251271  | 30251271 | 30251296 | 11655 | GTCGGCTTACTTTGCTCTGGATGTG         | 52.0 | 58.2 | 25 | -3.6 | 27.5 | -0.21 |
| MHC_68r_30262926 | 30262926 | 30262951 | 8049  | TGTGGCAGAGACATGAAACAGATGC         | 48.0 | 57.8 | 25 | -5.4 | 25   | -0.01 |
| MHC_69_30270976  | 30270976 | 30271000 | 6788  | CCACACAGTAGGCATTACACATGG          | 52   | 58   | 25 | -5.3 | 22.7 | 0.18  |
| MHC_70b_30277764 | 30277764 | 30277788 | 9213  | AAGCCCTTTATCATGCCTCTTTGCC         |      |      |    |      |      |       |
| MHC_71_30286976  | 30286976 | 30287001 | 7981  | ACATTCTTGCCCACACACATTACCT         | 44.0 | 56.9 | 25 | -3.1 | 18.3 | 0.43  |
| MHC_72_30294957  | 30294957 | 30294982 | 7354  | ATGGAAGATTCAGGTATTGTGACCC         | 44.0 | 54.9 | 25 | -3.5 | 28.9 | -0.32 |
| MHC_73r_30302311 | 30302311 | 30302336 | 8574  | CTG TCC CAT GCT GCC TTC CCT AAA G | 56.0 | 59.3 | 25 | -5.4 | 28.1 | -0.43 |
| MHC_74r_30310885 | 30310885 | 30310910 | 7775  | CTGCTGCTTTATGGAGACAAGGTGG         | 52.0 | 57.9 | 25 | -3.5 | 30.4 | -0.27 |
| MHC_75r_30318660 | 30318660 | 30318685 | 1590  | CCTATGCCACCTGCCAACACATAT          |      |      |    |      | 22.3 | 0.16  |
| MHC_76_30320251  | 30320251 | 30320275 | 14292 | GCAAACACTTCTATGGCTCACAGGG         | 52   | 58   | 25 | -3.1 | 18.3 | 0.36  |
| MHC_77_30334542  | 30334542 | 30334567 | 8571  | AGGGAAACTCGGGCTATGGAATGAA         | 48.0 | 57.7 | 25 | -3.6 | 22.9 | 0.07  |
| MHC_78_30343113  | 30343113 | 30343138 | 5243  | ATTCCAGCATCTACCTCGGTGTGAG         | 52.0 | 58.1 | 25 | -4.4 | 29.2 | -0.29 |
| MHC_79_30348356  | 30348356 | 30348381 | 16134 | TTTGGGCTTACACAGAGATGGCAAC         | 48.0 | 58.2 | 25 | -3.9 | 30.2 | -0.31 |
| MHC_80_30364490  | 30364490 | 30364515 | 1273  | ACCCAACCCACAGTAGATACCAACA         | 48.0 | 57.3 | 25 | -2.3 | 12.7 | 0.42  |
| MHC_81_30365764  | 30365764 | 30365788 | 6495  | GTGCTCAATCCCACCACACATCTTG         | 52   | 58   | 25 | -3.9 | 28.5 | -0.27 |
| MHC_82_30372258  | 30372258 | 30372283 | 10741 | TCAGAGGTCAGAAGGGTGTGCTG           | 52.0 | 58.6 | 25 | -3.6 | 22.5 | 0.19  |
| MHC_83b_30383000 | 30383000 | 30383024 | 7313  | ATTCTACAGGTCCCTTGCTCCCTTG         |      |      |    |      |      |       |
| MHC_84r_30390312 | 30390312 | 30390337 | 9420  | ATGCCTGCTGTCTGGTACTATGCTT         | 48.0 | 58.1 | 25 | -3.6 | 21.5 | 0.26  |
| MHC_85r_30399733 | 30399733 | 30399757 | 6648  | GGATGAAGGCGGGGTTAATTGTCC          | 52   | 58   | 25 | -5.3 | 12.3 | 0.75  |
| MHC_86r_30406380 | 30406380 | 30406405 | 8315  | CCTTCCTTGCCTGTCAATTTGGGATG        | 52.0 | 58.1 | 25 | -4.6 | 26.2 | -0.1  |
| MHC_87r_30414695 | 30414695 | 30414720 | 8143  | GCCTCACTGCTTCAAATGCTGGTAA         | 48.0 | 58.0 | 25 | -3.1 | 25   | -0.03 |
| MHC_88_30422838  | 30422838 | 30422863 | 8118  | TGAAGAGCTTGAGAGAAATGAGCCA         | 48.0 | 57.8 | 25 | -6.3 | 23.7 | 0.12  |
| MHC_89_30430956  | 30430956 | 30430981 | 8514  | TTGTATCCCAAACGGTCCCATCTCT         | 48.0 | 57.5 | 25 | -3.9 | 25   | 0     |
| MHC_90_30439471  | 30439471 | 30439495 | 6117  | GCTGGTGGTGTCTCAATGGTTGTTAT        | 48   | 58   | 25 | -3.9 | 27.7 | -0.17 |
| MHC_91_30445588  | 30445588 | 30445612 | 8641  | CTAGCTGGATCAGTGGGCTTCTAGG         | 56   | 58   | 25 | -6.3 | 34.8 | -0.92 |
| MHC_92r_30454228 | 30454228 | 30454253 | 11416 | GTAGGGAGCCAGATCCTCTTTCACC         | 56.0 | 58.1 | 25 | -4.7 | 32   | -0.63 |
| MHC_93_30465646  | 30465646 | 30465669 | 4659  | GACTCTATAACCATACCCAGGGCA          | 50   | 58   | 24 | -6.1 | 26.4 | -0.1  |
| MHC_94_30470303  | 30470303 | 30470328 | 8193  | AGCCTTATTGCAGGAGAGGAAGGTG         | 52.0 | 58.3 | 25 | -7.0 | 34.5 | -1.11 |
| MHC_95_30478496  | 30478496 | 30478521 | 11857 | AATGCCCTCAGAATAACCCCTCCTC         | 52.0 | 57.8 | 25 | -3.1 | 12.9 | 0.68  |
| MHC_96_30490353  | 30490353 | 30490378 | 4434  | ACACTTAGCCACTTCTGCTTCCCTCA        | 48.0 | 57.9 | 25 | -4.7 | 33.7 | -0.7  |
| MHC_97_30494787  | 30494787 | 30494812 | 5556  | GTGGAGGCTGAGAAACTAGGATGG          | 56.0 | 58.4 | 25 | -4.2 | 21.6 | 0.29  |
| MHC_98_30500343  | 30500343 | 30500368 | 14004 | TATCTTAGTGCCAGTTGAAACCTC          | 44.0 | 54.6 | 25 | -3.3 | 20.5 | 0.25  |
| MHC_99r_30514347 | 30514347 | 30514372 | 4801  | TCCAGTGAGTGAGAGGGATGAA            |      |      |    |      | 29.4 | -0.25 |

|                   |          |          |       |                                   |      |      |    |      |       |       |
|-------------------|----------|----------|-------|-----------------------------------|------|------|----|------|-------|-------|
| MHC_100_30519148  | 30519148 | 30519173 | 7458  | TCGGTTAATGTCTGTACCCTCCACT         | 48.0 | 56.9 | 25 | -4.9 | 23.8  | 0.07  |
| MHC_101_30526606  | 30526606 | 30526631 | 6858  | GACCAAGTAGGCTCTAACCACGGAA         | 52.0 | 58.0 | 25 | -3.6 | 37.6  | -0.71 |
| MHC_102_30533462  | 30533462 | 30533489 | 9618  | TACGTGTCTCTGTATAGGCCAAACTGT       | 40.7 | 55.6 | 27 | -4.7 | 29.9  | -0.45 |
| MHC_103_30543082  | 30543082 | 30543107 | 3904  | CTGGAATAACTGAGGCTGAACGCAC         | 52.0 | 58.2 | 25 | -3.6 | 40.2  | -1.1  |
| MHC_104_30546986  | 30546986 | 30547011 | 10070 | GCCTTGATTTTCCCAGCACAATTTTC        | 44.0 | 55.5 | 25 | -5.4 | 24.1  | 0.05  |
| MHC_105_30557060  | 30557060 | 30557081 | 9684  | CGCAGAGGAAGACAGACCCCTA            | 59   | 60   | 22 | -4.6 | 29.7  | -0.31 |
| MHC_106r_30566740 | 30566740 | 30566765 | 6623  | AGCCTGGACTTAGGGATCTGGGATA         | 52.0 | 57.8 | 25 | -4.7 | 29.4  | -0.42 |
| MHC_107_30573364  | 30573364 | 30573388 | 10065 | AATCACCTATGCTTCCCTCAGTGGTA        | 44   | 57.4 |    | -4.4 | 32    | -0.54 |
| MHC_108r_30583428 | 30583428 | 30583453 | 7611  | TGG AAT CTG GTG CCT GTG TTA T     | 48.0 | 57.7 | 25 | -3.1 | 22.2  | 0.19  |
| MHC_109_30591039  | 30591039 | 30591064 | 5362  | CGTAGTTCTTACAGAGGGCTCCAT          | 52.0 | 58.1 | 25 | -3.6 | 23.5  | 0.06  |
| MHC_110_30596401  | 30596401 | 30596426 | 7447  | GGATGCTCGCCAATCTCCTCTGAAT         | 52.0 | 58.7 | 25 | -4.6 | 20.5  | 0.37  |
| MHC_111_30603848  | 30603848 | 30603873 | 13366 | AATGAGAAACCATTTGTCCCAAGACTG       | 42   | 57.4 | 26 | -5.3 | 38.9  | -1.27 |
| MHC_112_30617214  | 30617214 | 30617239 | 5437  | GCTACTGACACAAGAACGACAATGC         | 48.0 | 57.0 | 25 | -3.6 | 21.7  | 0.2   |
| MHC_113_30622651  | 30622651 | 30622676 | 8068  | CCACTCCCATAACACAGTCCTTCCA         | 52.0 | 57.9 | 25 | -2.9 | 0.5   | 1.25  |
| MHC_114_30630719  | 30630719 | 30630744 | 8163  | AAGAGTACATCCAGACCCCTCCTT          | 52.0 | 58.1 | 25 | -3.6 | 16.6  | 0.48  |
| MHC_115_30638882  | 30638882 | 30638907 | 7739  | TCCCCTTGTAGCCTTTCTCAGTGTC         | 52.0 | 57.9 | 25 | -3.1 | 15.9  | 0.51  |
| MHC_116_30646621  | 30646621 | 30646646 | 8244  | ATTGGTCTGCACTGTCTTTTCTGCC         | 48.0 | 58.0 | 25 | -7.0 | 30    | -0.51 |
| MHC_117_30654865  | 30654865 | 30654890 | 7377  | CTACTTGACTCTTCTGCGTGTGC           | 52.0 | 58.1 | 25 | -3.6 | 33.7  | -0.52 |
| MHC_118_30662242  | 30662242 | 30662267 | 4483  | GCTACCAGGGACAGAAACCACTCTT         | 52.0 | 58.2 | 25 | -3.2 | 27.5  | -0.19 |
| MHC_119b_30666726 | 30666726 | 30666750 | 12113 | ATTGTGAGGTTCCATCCAGCCAAGT         |      |      |    |      |       |       |
| MHC_120_30678838  | 30678838 | 30678863 | 7490  | GTCTTCCCCTCCCATTTCTTGCTA          | 52.0 | 58.0 | 25 | -3.1 | 12.1  | 0.73  |
| MHC_121_30686328  | 30686328 | 30686353 | 8123  | GGAGTAGGTGCCAGAGATTGAGACA         | 52.0 | 57.5 | 25 | -3.1 | 26.7  | -0.12 |
| MHC_122r_30694451 | 30694451 | 30694476 | 7775  | ACAGGGCAGAACAACCTTGAGTCCT         |      |      |    |      | 30.3  | -0.37 |
| MHC_123_30702226  | 30702226 | 30702251 | 8541  | GATGCTGTGGGGAGATAAGTGGTCA         | 52.0 | 58.1 | 25 | -3.1 | 19.2  | 0.36  |
| MHC_124_30710767  | 30710767 | 30710792 | 8236  | GTCTCGTTCTGAGCATTCCAGTAGC         | 52.0 | 57.5 | 25 | -3.6 | 37.1  | -0.95 |
| MHC_125_30719003  | 30719003 | 30719028 | 7941  | TGTGGAATGGTAGGAAGAACCCGA          | 48.0 | 57.6 | 25 | -4.4 | 27.1  | -0.21 |
| MHC_126_30726944  | 30726944 | 30726969 | 8030  | TGTTCCCAATTCCTTAGAAGCCAGT         | 48.0 | 57.6 | 25 | -3.5 | 25    | 0.02  |
| MHC_127_30734974  | 30734974 | 30734999 | 7599  | TCCCACCTCTTAGCACATCAAGGAC         | 52.0 | 58.0 | 25 | -4.7 | 36.6  | -1    |
| MHC_128_30742575  | 30742575 | 30742598 | 8381  | GCCCTCTGCTGTTCTACCCTTA            | 56.5 | 57.6 | 23 | -3.1 | 19.9  | 0.34  |
| MHC_129_30750954  | 30750954 | 30750979 | 8040  | TGACACCTGGCTTGTCTCTTGCTA          | 48.0 | 58.1 | 25 | -3.3 | 27.5  | -0.21 |
| MHC_130_30758994  | 30758994 | 30759019 | 7510  | AGATGTGTGACTGGAGGGACTTC           | 52.0 | 57.9 | 25 | -1.6 | 32    | -0.18 |
| MHC_131_30766504  | 30766504 | 30766529 | 9169  | TTCCCCTGTCATTTGTTTCCAAGCC         | 48.0 | 57.9 | 25 | -3.9 | 18.1  | 0.49  |
| MHC_132_30775673  | 30775673 | 30775698 | 7216  | CTAAAGATGCTTCCAGAGGCCAGGA         | 52.0 | 58.1 | 25 | -9.3 | 25    | -0.04 |
| MHC_133r_30782889 | 30782889 | 30782914 | 7726  | GTTTCTTCTTTCTTTGCCCCAGCCA         | 48.0 | 58.1 | 25 | -3.1 | 31.5  | -0.49 |
| MHC_134_30790615  | 30790615 | 30790640 | 7971  | TCCAGTGAGTCCAGGGTAGTAGTCT         | 52.0 | 57.4 | 25 | -3.1 | 20.3  | 0.35  |
| MHC_135_30798586  | 30798586 | 30798611 | 8239  | CTCTGATCCCTGCTGTCTCCCATTT         | 52.0 | 58.0 | 25 | -4.6 | 4.2   | 1.04  |
| MHC_136_30806825  | 30806825 | 30806850 | 7992  | TGCTCCTCAACTGCTGCTTAGTCT          | 48.0 | 57.8 | 25 | -3.1 | 28.6  | -0.29 |
| MHC_137r_30814818 | 30814818 | 30814842 | 7726  | GCAGCCCTTGATATTGCCAGGAAG          | 54.2 | 58.1 | 24 | -5.1 | 31.8  | -0.55 |
| MHC_138_30822543  | 30822543 | 30822568 | 9115  | TCAGTATAAGTGCTGTGCCATGCAG         | 48.0 | 57.4 | 25 | -7.0 | 37.3  | -1.12 |
| MHC_139r_30831658 | 30831658 | 30831683 | 7795  | GCTCTATTCCAGCCCCTCTGTCC           | 56.0 | 58.5 | 25 | -4.7 | 25    | -0.03 |
| MHC_140r_30839453 | 30839453 | 30839478 | 6947  | AGG AAA GAA AGG AGC AGA TGT GGC A | 48.0 | 58.4 | 25 | -3.1 | 25    | 0.01  |
| MHC_141_30846400  | 30846400 | 30846425 | 8154  | AGTGTTAGGTAAGTGTGGAGGAGA          | 44.0 | 54.8 | 25 | -2.9 | -21.8 | 1.56  |
| MHC_142r_30854554 | 30854554 | 30854579 | 9115  | CAA AGA AAT GCT GCC CCA ACA CAC T | 48.0 | 58.6 | 25 | -3.1 | 10.2  | 0.93  |
| MHC_143r_30863669 | 30863669 | 30863694 | 6908  | TTG GGA TCA TAC AGC AGA GAC AGC A | 48.0 | 57.8 | 25 | -4.6 | 28.6  | -0.29 |
| MHC_144_30870577  | 30870577 | 30870602 | 8088  | GACAACATAAAGCCCTGTGCCCC           | 52.0 | 57.9 | 25 | -3.3 | 35    | -0.57 |
| MHC_145_30878665  | 30878665 | 30878690 | 7587  | GCCTTCTACAGACAAGCCAATGTGA         | 48.0 | 57.3 | 25 | -3.5 | 30.9  | -0.44 |
| MHC_146_30886252  | 30886252 | 30886277 | 8326  | GAGAATCGGTTACTAGGCCGTATGA         | 48.0 | 55.8 | 25 | -9.3 | 43    | -1.93 |
| MHC_147_30894578  | 30894578 | 30894603 | 8290  | ACTGTCCTGTACTTAGCCTTGCTCT         | 48.0 | 57.2 | 25 | -4.7 | 34.7  | -0.7  |
| MHC_148_30902868  | 30902868 | 30902893 | 8103  | CTAGGTCTTATGGCAGTCGGGGC           | 56.0 | 58.3 | 25 | -4.2 | 18    | 0.42  |
| MHC_149_30910971  | 30910971 | 30910996 | 8660  | GGTGTGCTTGAGCAGAGTTGAGA           | 52.0 | 58.4 | 25 | -3.2 | 29.9  | -0.34 |
| MHC_150r_30919631 | 30919631 | 30919656 | 6279  | CCACCTTTGGCTTTTCTAGGCTTTG         | 48.0 | 56.8 | 25 | -5.0 | 30.6  | -0.43 |

|                   |          |          |       |                                   |      |      |    |      |       |       |
|-------------------|----------|----------|-------|-----------------------------------|------|------|----|------|-------|-------|
| MHC_151_30925910  | 30925910 | 30925935 | 8161  | AGACAGGTAGCATGAGTTCTTGCCA         | 48.0 | 57.9 | 25 | -5.4 | 29    | -0.34 |
| MHC_152_30934071  | 30934071 | 30934096 | 7747  | CTGGTGAGAAATGGAGGTGTGTAGTG        | 52.0 | 56.8 | 25 | -1.6 | 3.2   | 0.92  |
| MHC_153_30941818  | 30941818 | 30941843 | 9075  | CACAAAACAGCCACCTCTACTTCC          | 52.0 | 57.7 | 25 | -3.1 | -13.5 | 1.21  |
| MHC_154_30950893  | 30950893 | 30950918 | 7535  | TGACTGCCCTCTGACTTCTTCACTT         | 48.0 | 57.6 | 25 | -3.5 | 23.5  | 0.14  |
| MHC_155_30958428  | 30958428 | 30958453 | 7934  | AGAGGGGACAAAGTTTCAGGACTC          | 52.0 | 57.9 | 25 | -3.9 | 6     | 0.66  |
| MHC_156r_30966362 | 30966362 | 30966387 | 8191  | CCT TCA TTT CAG CCC ATT CCC TCT G | 52.0 | 57.6 | 25 | -3.6 | 27.8  | -0.16 |
| MHC_157_30974553  | 30974553 | 30974578 | 7879  | CAGAGTGGATCTGGGGCTTCCAATA         | 52.0 | 57.8 | 25 | -6.6 | 43.3  | -1.75 |
| MHC_158_30982432  | 30982432 | 30982457 | 7853  | GGCACTTCCCTGTCTGATTGTAGGGA        | 52.0 | 58.0 | 25 | -4.7 | 28.5  | -0.35 |
| MHC_159_30990285  | 30990285 | 30990310 | 7994  | ATCATCTCCCTGAGTTTCTGAGCCC         | 52.0 | 57.8 | 25 | -3.5 | 26.3  | -0.11 |
| MHC_160_30998279  | 30998279 | 30998304 | 8207  | CAAGAGACATCATCAGTGGGGTGGGA        | 52.0 | 58.0 | 25 | -2.0 | 26.5  | -0.12 |
| MHC_161_31006486  | 31006486 | 31006511 | 8376  | TCACAAGCTGAACCCGTCATCTCTC         | 52.0 | 58.5 | 25 | -6.3 | 26.4  | -0.1  |
| MCH_162b_31014862 | 31014862 | 31014887 | 8112  | CCAGGTTTCTCCATCCCAGACATCA         | 52.0 | 58.0 | 25 | -3.2 | 39.5  | -1.07 |
| MHC_163_31022974  | 31022974 | 31022999 | 7509  | CAGGTAATGGGATTGGGACAGTGGGA        | 52.0 | 58.0 | 25 | -3.4 | 27.3  | -0.1  |
| MHC_164_31030483  | 31030483 | 31030508 | 8339  | TCAGTCCCAACAGAAACCTCCCATC         | 52.0 | 58.2 | 25 | -1.6 | 25    | 0.01  |
| MHC_165_31038822  | 31038822 | 31038847 | 8942  | CAACTTTCACACCTGAAGAGGCTG          | 52.0 | 58.0 | 25 | -5.5 | 39.4  | -1.09 |
| MHC_166_31047764  | 31047764 | 31047789 | 6819  | CCTCTATTCTGGTGACTGGTGCTGT         | 52.0 | 58.0 | 25 | -3.1 | 3.2   | 0.94  |
| MHC_167r_31054583 | 31054583 | 31054608 | 7649  | AGA TGA AGA ACT GGA GGG CAC TGA G | 52.0 | 58.0 | 25 | -3.1 | 4.2   | 1.04  |
| MHC_168_31062232  | 31062232 | 31062257 | 7558  | GGGATCAGCATAGCCACCAACTCTG         | 56.0 | 59.2 | 25 | -4.6 | 23.6  | 0.1   |
| MHC_169_31069790  | 31069790 | 31069815 | 8844  | CCTACAACCTCTGCCCTACATGG           | 56.0 | 58.6 | 25 | -5.4 | 28.4  | -0.16 |
| MHC_170_31078634  | 31078634 | 31078659 | 7867  | GGAAGTGTGGAAACCCCTTATGTGGA        | 48.0 | 56.7 | 25 | -3.1 | 34.8  | -0.61 |
| MHC_171_31086501  | 31086501 | 31086526 | 9161  | GTGGCTGCTTCTTTGGACTTCTG           | 52.0 | 58.0 | 25 | -3.1 | 4.2   | 0.92  |
| MHC_172_31095662  | 31095662 | 31095687 | 6825  | CTTGTGAGGGTGAGAGGGAGTATGG         | 56.0 | 57.8 | 25 | -1.6 | 6.8   | 1.03  |
| MHC_173_31102487  | 31102487 | 31102512 | 8586  | TCGAAACCATCACACCCTCTACTG          | 52.0 | 58.0 | 25 | -3.6 | 29.3  | -0.25 |
| MHC_174_31111073  | 31111073 | 31111098 | 7536  | TCCCTGTGTTTCTCATGGTGCTAT          | 48.0 | 57.7 | 25 | -5.4 | 29.2  | -0.35 |
| MHC_175r_31118609 | 31118609 | 31118634 | 6293  | TGTTCCCTTACAGAAATGCCACCTCT        | 48.0 | 58.1 | 25 | -3.5 | 23.9  | 0.12  |
| MHC_176r_31124901 | 31124901 | 31124927 | 9546  | TCG TCC CTT AGT GTG ACT TAT CC    | 50.0 | 57.9 | 26 | -3.6 | 18.7  | 0.46  |
| MHC_177_31134448  | 31134448 | 31134473 | 7863  | CTCAGGGTGTGGGAAGTAAGAGGAA         | 52.0 | 57.4 | 25 | -3.2 | 18.4  | 0.39  |
| MHC_178r_31142311 | 31142311 | 31142336 | 7895  | TGCCACCTCCTTTCATGGGTAGAAG         | 52.0 | 58.2 | 25 | -5.4 | 27.9  | -0.22 |
| MHC_179_31150206  | 31150206 | 31150231 | 8164  | CATTCTCACCTCTGTCTTCTACCA          | 48.0 | 55.5 | 25 | -2.0 | 18.7  | 0.36  |
| MHC_180_31158370  | 31158370 | 31158395 | 7878  | AGGAAGAGAGAATTAGGGGTTGGTA         | 44.0 | 54.4 | 25 | -5.4 | -2.3  | 1.25  |
| MHC_181r_31166248 | 31166248 | 31166273 | 7484  | GTC ACC CAG CAA CGT ATT TTG ATT G | 44.0 | 55.5 | 25 | -6.3 | 21.1  | 0.34  |
| MHC_182r_31173732 | 31173732 | 31173757 | 9269  | CCAAGTCAACCCAAATTCCTCATCTT        | 40.0 | 53.8 | 25 | -5.4 | 12.4  | 1.11  |
| MHC_183_31183001  | 31183001 | 31183026 | 7785  | TGTAACTCCCAGTGCAAAGCATCAC         | 48.0 | 57.8 | 25 | -7.0 | 29.4  | -0.3  |
| MHC_184_31190786  | 31190786 | 31190811 | 7972  | CTGGAGCAATGAGAGAGGAGGGAAA         | 52.0 | 57.8 | 25 | -3.1 | -13.7 | 1.69  |
| MHC_185_31198758  | 31198758 | 31198783 | 8236  | TTCCAACACAAACTTCCCCTGACCA         | 48.0 | 58.4 | 25 | -2.0 | 15.3  | 0.62  |
| MHC_186_31206995  | 31206995 | 31207019 | 7665  | CATTAAGTGTGCATGACGGCCAG           | 54.2 | 58.6 | 24 | -9.3 | 28    | -0.17 |
| MHC_187_31214659  | 31214659 | 31214684 | 8092  | TTCACCTCCGCCATCTTGAGTATCC         | 52.0 | 58.1 | 25 | -3.6 | 23.9  | 0.07  |
| MHC_188_31222750  | 31222750 | 31222776 | 8189  | GACTCATCTGCATCTTAATTTCCGCT        | 42.3 | 55.7 | 26 | -7.0 | 25    | 0.03  |
| MHC_189_31230940  | 31230940 | 31230965 | 8095  | GGAAAGGTTGGAAGAACACACAGGG         | 52.0 | 57.9 | 25 | -3.3 | 36.2  | -0.97 |
| MHC_190b_31239035 | 31239035 | 31239060 | 7516  | CTTGCTTTCCAGGGAGAATTGTGCTT        | 48.0 | 57.7 | 25 | -4.6 | 22.7  | 0.19  |
| MHC_191_31246551  | 31246551 | 31246576 | 8581  | CTAATGGTGGTGGCAATGGTGTCTG         | 52.0 | 58.1 | 25 | -3.1 | 20.7  | 0.33  |
| MHC_192_31255132  | 31255132 | 31255157 | 8001  | CCACGCTGCTGTACCCCTTTATTTT         | 52.0 | 58.2 | 25 | -3.6 | 21.3  | 0.22  |
| MHC_193_31263133  | 31263133 | 31263158 | 7544  | AGGGTTTGTGGTTAGGAAGTGAGC          | 48.0 | 57.1 | 25 | -3.1 | -29.5 | 1.7   |
| MHC_194_31270677  | 31270677 | 31270702 | 7718  | CAAACCCACAAATGACTTCTGCCAT         | 48.0 | 58.0 | 25 | -3.4 | 9.2   | 0.67  |
| MHC_195_31278395  | 31278395 | 31278420 | 11764 | AGTGTTTTCCAGAGGACCAGGGTTGA        | 48.0 | 57.7 | 25 | -4.4 | 23.3  | 0.07  |
| MHC_196_31290159  | 31290159 | 31290184 | 1648  | AAGGTTGTTGTGAAGGTCATCTGTG         | 44.0 | 55.7 | 25 | -3.5 | 11.9  | 0.49  |
| MHC_197_31291806  | 31291806 | 31291832 | 9179  | ATAGACTTGAACCTGACCCAATGCCCA       | 46.2 | 58.0 | 26 | -3.9 | 15    | 0.7   |
| MHC_198_31300986  | 31300986 | 31301011 | 11055 | TAGTGGATTGTGGATTGAGGTGCGA         | 48.0 | 58.0 | 25 | -3.6 | -9.9  | 1.31  |
| MHC_199_31312039  | 31312039 | 31312066 | 6322  | ACCCGTGTTTATCTCTGTATCTCTGG        | 44.4 | 55.7 | 27 | -3.1 | -1.9  | 1.25  |
| MHC_200_31318363  | 31318363 | 31318388 | 8517  | ACTCCGCATCTGCTTCTTAAGACAT         | 48.0 | 57.8 | 25 | -5.1 | 36.1  | -0.89 |
| MHC_1_31326881    | 31326881 | 31326905 | 13174 | GGACAAAGGCTAATTCCTCAGAAT          | 40.0 | 53.4 | 25 | -5.4 | 21.5  | 0.19  |

|                  |          |          |       |                                    |      |      |    |       |       |       |
|------------------|----------|----------|-------|------------------------------------|------|------|----|-------|-------|-------|
| MHC_2_31340054   | 31340054 | 31340079 | 2187  | GTCCTAAGTCTGCTAAACACAGGTT          | 46   | 58   | 26 | -4.6  | 30.6  | -0.49 |
| MHC_3_31342241   | 31342241 | 31342266 | 7741  | TATACATCCTCCCTTTCTTTCTGC           | 44.0 | 54.1 | 25 | -3.4  | -2.4  | 1.76  |
| MHC_4_31349982   | 31349982 | 31350007 | 12302 | TGCCCAGTAGAGAAACACCAATGC           | 48.0 | 57.7 | 25 | -3.1  | 23.3  | 0.06  |
| MHC_5r_31362284  | 31362284 | 31362309 | 4248  | TGT TCT AAA GGA GGC CAC AGG AGT TC | 50   | 60   | 26 | -9.2  | 23.3  | 0.07  |
| MHC_6r_31366532  | 31366532 | 31366557 | 8070  | CAT AGA ACC TTG GGG TCA CAG ATG C  | 52.0 | 57.4 | 25 | -4.4  | 36    | -0.76 |
| MHC_7_31374602   | 31374602 | 31374627 | 8510  | GGGGAGATGAGGTGATACTGGGTTT          | 52.0 | 57.5 | 25 | -1.6  | 6.8   | 0.81  |
| MHC_8_31383112   | 31383112 | 31383137 | 7768  | AACCTAGCAGCTTTCGTGGTACTT           | 48.0 | 57.4 | 25 | -4.4  | 32    | -0.54 |
| MHC_9_31390880   | 31390880 | 31390905 | 4494  | GGGTGAGACTTTCTTGAACTCAGCA          | 48.0 | 56.9 | 25 | -5.1  | 33.4  | -0.86 |
| MHC_10_31395376  | 31395376 | 31395399 | 8634  | CCCAGCCAACACATAGAACCCTA            | 52.2 | 55.9 | 23 | -3.1  | 19.9  | 0.35  |
| MHC_11_31401206  | 31404012 | 31404033 | 14009 | ATGGTTCATGGATGTTAGGGC              |      |      |    |       |       |       |
| MHC_12_31412706  | 31418015 | 31418042 | 12767 | ACCCAGAATTATAGAGTGAACGTGAGA        |      |      |    |       |       |       |
| MHC_13r_31430785 | 31430785 | 31430809 | 7765  | TCCCTTGTAAGATGGACCCCGAA            | 54.2 | 59.0 | 24 | -4.7  | 27.7  | -0.2  |
| MHC_14_31438549  | 31438549 | 31438574 | 11925 | GTCTTGCTCTTCCACTCTACCCAGT          | 52.0 | 57.7 | 25 | -3.1  | 12.8  | 0.78  |
| MHC_15r_31450473 | 31450473 | 31450499 | 3878  | GTT AGC CCC AGA GTT GCA TCT GAG CA | 53.8 | 62   | 26 | -7    | 36.4  | -1.34 |
| MHC_16_31454352  | 31454352 | 31454377 | 5454  | CGTCAGTTATGGAATGTGGACCCCT          | 52.0 | 58.3 | 25 | -3.6  | 21.6  | 0.27  |
| MHC_17_31463174  | 31459808 | 31459831 | 11024 | GCTGAGAAATGACAGAGCACGGGAG          | 58   | 61.4 | 24 | -4.7  | 37.6  | -1.18 |
| MHC_18_31470830  | 31470830 | 31470855 | 7957  | TCGCTTTGTGTAGGAAGGATCAGGA          | 48.0 | 57.5 | 25 | -4.6  | 26.4  | -0.06 |
| MHC_19_31478787  | 31478787 | 31478812 | 8415  | AGTTTGTGGTCTGAGCGTTCTACT           | 48.0 | 57.9 | 25 | -3.6  | 22.2  | 0.19  |
| MHC_20_31487202  | 31487202 | 31487227 | 5327  | TGTGCTATGGATGAAGGCATTTCTCTG        | 46   | 59   | 26 | -5    | 43    | -1.15 |
| MHC_21r_31492531 | 31492531 | 31492554 | 5258  | TCT CTG CCA TGA CCA CCT TAC GTG    |      |      |    |       |       |       |
| MHC_22_31497789  | 31497789 | 31497812 | 15769 | ATGGTGTGAGAAAGAGCCCTGAAG           |      |      |    |       |       |       |
| MHC_23r_31513556 | 31513556 | 31513581 | 5133  | TCACAACAATTCTCACTACCCGATT          | 40.0 | 54.7 | 25 | -3.1  | 10.6  | 0.61  |
| MHC_24_31518689  | 31518689 | 31518714 | 6763  | CGCACTTCCCTCACTTTGATACCCCT         | 52.0 | 58.5 | 25 | -3.6  | 10.9  | 0.63  |
| MHC_25_31525452  | 31525452 | 31525477 | 8974  | GGACCGTGACCTTGGAGTAAGAACC          | 56.0 | 58.8 | 25 | -3.6  | 36.4  | -0.85 |
| MHC_26_31534426  | 31534426 | 31534451 | 9648  | AGGGAGAGTTTGTGATGATTGGTT           | 40.0 | 54.6 | 25 | -1.5  | -81.9 | 1.86  |
| MHC_27_31544054  | 31544075 | 31544099 | 6714  | GGCACCCATCTGATAATGCTGTCCT          | 60   | 52   | 25 | -5    | 35    | -0.99 |
| MHC_28_31550788  | 31550788 | 31550813 | 6615  | GTATCATCCCATCCACCAGTGCCTT          | 52.0 | 58.3 | 25 | -3.3  | 21.9  | 0.21  |
| MHC_29b_31557403 | 31557403 | 31557428 | 9295  | AGTGAGGACCAATGAGTTGACAGGT          | 48   | 57.6 | 25 | -4.4  | 35.5  | -0.9  |
| MHC_30_31566698  | 31566698 | 31566723 | 6651  | TCCCTGAGTGTCCCTTGACTTTCTCTC        | 52.0 | 57.6 | 25 | -3.2  | 32.5  | -0.55 |
| MHC_31r_31573350 | 31573350 | 31573374 | 8959  | TCA GAA GCA CTT GCC CCA GTA GAA A  | 48   | 60   | 25 | -5    | 36.2  | -0.8  |
| MHC_32_31582308  | 31582308 | 31582333 | 8106  | TGTGTCCTGATTTGCCTCTCCTGTT          | 48.0 | 58.1 | 25 | -3.1  | 10.2  | 1.06  |
| MHC_33_31590414  | 31590414 | 31590439 | 8337  | ACACCTGACCTACATTTCTTCAGTT          | 40.0 | 54.1 | 25 | -5.1  | 32.1  | -0.78 |
| MHC_34_31598751  | 31598751 | 31598776 | 8382  | TGGCTAAACTTCAACATCCCTCAGC          | 48.0 | 57.3 | 25 | -4.7  | 21.3  | 0.29  |
| MHC_35b_31607133 | 31607133 | 31607158 | 7376  | CGCTGCACAGACTTCACAAAGATCA          | 48.0 | 58.1 | 25 | -7.0  | 39    | -1.1  |
| MHC_36_31614509  | 31614509 | 31614534 | 8199  | CTTGGCTTACCTTGACATTGGGCAT          | 48.0 | 57.8 | 25 | -3.1  | 33.8  | -0.61 |
| MHC_37_31622708  | 31622708 | 31622733 | 8218  | GGGTTGTGAATGCGGTGAAAAGGTA          | 48.0 | 58.0 | 25 | -3.6  | -7.9  | 1.78  |
| MHC_38_31630929  | 31630929 | 31630951 | 8225  | CCTACAGCCCCACCACCCATAG             | 63.6 | 58.1 | 22 | -3.1  | 4.4   | 1.64  |
| MHC_39_31639151  | 31639151 | 31639176 | 4977  | TGAAGAACATCAGAGGCACGGAGAT          | 48.0 | 57.8 | 25 | -3.6  | 21    | 0.35  |
| MHC_40b_31644129 | 31644129 | 31644153 | 10317 | CTAGAAAACAGGGTTGGGTTGGGGTA         | 52   | 60   | 25 | -4    | 25    | -0.03 |
| MHC_41_31654446  | 31654446 | 31654470 | 8197  | CACAGCCAAGGGACTTCCAGAGAT           | 54.2 | 58.1 | 24 | -4.6  | 38.1  | -0.96 |
| MHC_42_31662642  | 31662642 | 31662667 | 6217  | CCTTACCAGCACCTAGAACCATCCA          | 52.0 | 57.8 | 25 | -4.2  | 15.2  | 0.55  |
| MHC_43r_31668859 | 31668859 | 31668884 | 6341  | TCCTCTGGTCGAAAATGGGTCTTGT          | 48.0 | 57.6 | 25 | -6.3  | 21.6  | 0.22  |
| MHC_44b_31675201 | 31675201 | 31675225 | 11876 | TAAACTTCCAGACCCCATGCCCCTA          | 48   | 59.8 | 25 | -3.14 | 20.9  | 0.18  |
| MHC_45r_31687076 | 31687076 | 31687101 | 7702  | CGGGTCAGTCGTAGAGAACAAGTAG          | 52.0 | 57.9 | 25 | -3.1  | 21.7  | 0.22  |
| MHC_46_31694778  | 31694778 | 31694803 | 7639  | TTCTCAATCACCCAGGCATAATCA           | 44.0 | 56.0 | 25 | -3.1  | 13.2  | 0.55  |
| MHC_47r_31702417 | 31702417 | 31702442 | 7805  | GCCTCCCTTCTATAACCGTAACCA           | 52.0 | 58.6 | 25 | -3.9  | 5     | 0.83  |
| MHC_48_31710222  | 31710222 | 31710247 | 8103  | CTCCAGCCACTAGCCGAAAGAGTTA          | 52.0 | 58.1 | 25 | -4.2  | 36.7  | -0.66 |
| MHC_49_31718325  | 31718325 | 31718350 | 8450  | CAGGCAGCACAACCTACCTCTCT            | 52.0 | 58.2 | 25 | -4.7  | 26.8  | -0.1  |
| MHC_50_31726775  | 31726775 | 31726800 | 8204  | AGACACACTTGCATTAGGGTTCCGT          | 48   | 57.8 | 25 | -4.7  | 33.3  | -0.63 |
| MHC_51_31734979  | 31734979 | 31735004 | 7458  | TGGGCAGTAAGTAGGCTCAGAACAG          | 52   | 58   | 25 | -3.1  | 26.4  | -0.12 |
| MHC_52_31742437  | 31742437 | 31742462 | 8399  | GAGTGCTTACAGAGTTGGGTTGCTT          | 48   | 57.9 | 25 | -3.1  | 23.8  | 0.1   |

|                   |          |          |       |                                   |      |      |    |      |       |       |
|-------------------|----------|----------|-------|-----------------------------------|------|------|----|------|-------|-------|
| MHC_53_31750836   | 31750836 | 31750861 | 8240  | AGATGAGTATAGCCAGGTGTCTGCC         | 52   | 57.7 | 25 | -3.6 | 33.7  | -0.71 |
| MHC_54_31759076   | 31759076 | 31759101 | 7261  | TGTCCCTTCTGAGTCTCCTACCTA          | 52   | 57.9 | 25 | -3.2 | 23.6  | 0.09  |
| MHC_55r_31766337  | 31766337 | 31766362 | 8278  | TAG GTG ATC TGC TGT GAG GGG AAT G | 52   | 57.8 | 25 | -4.6 | 30.4  | -0.32 |
| MHC_56_31774616   | 31774616 | 31774640 | 7729  | TGTTGAAGCATCGCCCATCCAGTG          | 54.2 | 59.8 | 24 | -3.6 | 17.8  | 0.39  |
| MHC_57_31782344   | 31782344 | 31782369 | 7959  | CAG AGA AGT GGT CCT GCC TGT CTA G | 56   | 58.1 | 25 | -4.2 | 35.9  | -0.77 |
| MHC_58_31790303   | 31790303 | 31790328 | 7980  | TTC CTC CTT CCC AGT CTC TTC AAC C | 52   | 57.6 | 25 | -1.9 | 9.3   | 0.97  |
| MHC_59_31798284   | 31798284 | 31798308 | 8563  | CTT CTA CCT CAC CTC TCT GTG CCC   | 58.3 | 58   | 24 | -3.3 | 28.9  | -0.3  |
| MHC_60_31806846   | 31806846 | 31806871 | 7743  | AACCAGCTCAACTCCTCACTGTCTT         | 48   | 57.8 | 25 | -6.3 | 27.2  | -0.18 |
| MHC_61_31814589   | 31814589 | 31814614 | 8524  | TCCATTGCTCAACAGATTTGCCAGG         | 48   | 58   | 25 | -3.9 | 26.4  | -0.1  |
| MHC_62_31823113   | 31823113 | 31823138 | 5809  | CAAGTTCACTCCCTGCCTTATCCCT         | 52   | 58   | 25 | -3.5 | 5.8   | 0.78  |
| MHC_63r_31828922  | 31828922 | 31828947 | 9733  | CGA TGT GCT ATG GGA ATG TAG TGG C | 52   | 57.8 | 25 | -3.6 | 15.4  | 0.61  |
| MHC_64_31838655   | 31838655 | 31838680 | 8365  | TCTTCTCAAGTAGGAACACCCCAGC         | 52   | 57.9 | 25 | -3.5 | 28.3  | -0.18 |
| MHC_65_31847020   | 31847020 | 31847045 | 7207  | AAT GCC TAC TGG ACT GAG AGT TGC C | 52   | 58.5 | 25 | -3.1 | 40.3  | -0.99 |
| MHC_66_31854227   | 31854227 | 31854252 | 7174  | GTACAGAGTCCAGCTTCCAGACCAG         | 56   | 58.3 | 25 | -6.3 | 26.2  | -0.12 |
| MHC_67_31861401   | 31861401 | 31861426 | 9113  | ATAGCTTCTTCTCCACCACCACCTG         | 52   | 58   | 25 | -6.3 | 2.4   | 1.06  |
| MHC_68_31870514   | 31870514 | 31870539 | 6608  | TCATTGTCCATTCCAGTCCCTCGCTT        | 48   | 58.2 | 25 | -3.6 | -13.9 | 1.47  |
| MHC_69_31877122   | 31877122 | 31877147 | 9535  | AAACATTTGACAGACACCCACCATC         | 48   | 58   | 25 | -3.8 | 5.4   | 1     |
| MHC_70_31886657   | 31886657 | 31886682 | 7068  | CGG CTG CTT CAG GAC TAC TTC AAT G | 52   | 58   | 25 | -3.6 | 29.8  | -0.37 |
| MHC_71b_31893726  | 31893726 | 31893750 | 9338  | GGTCAGTAGGGTCTGCATAGGTTGT         | 52   | 57.8 | 25 | -7   | 29.6  | -0.45 |
| MHC_72_31903063   | 31903063 | 31903088 | 8115  | CCAATCAGAGTTTCCCAGGCACATC         | 52   | 57.9 | 25 | -3.1 | 10.4  | 1.02  |
| MHC_73_31911178   | 31911178 | 31911203 | 7887  | CGTTTCATCGCCGTGTTATCCCTTGAG       | 52   | 58.3 | 25 | -3.6 | 28.6  | -0.16 |
| MHC_74_31919065   | 31919065 | 31919090 | 8087  | AGATAACAGAGTTTCTACCCACCCT         | 48   | 56.1 | 25 | -3.3 | 19.4  | 0.38  |
| MHC_75_31927152   | 31927152 | 31927177 | 7729  | TGGGAGTGGGGATCAATGTGTGAAG         | 52   | 58.4 | 25 | -4.6 | 29.5  | -0.33 |
| MHC_76_31934881   | 31934881 | 31934906 | 9195  | GAACTCACCCAGGCTCACAAAGGATA        | 52   | 58   | 25 | -3.1 | 28.2  | -0.18 |
| MHC_77_31944076   | 31944076 | 31944101 | 6646  | GGCTCTGTGTTCCAAGGGAGTAAGA         | 52   | 58   | 25 | -4.6 | 27.9  | -0.27 |
| MHC_78_31950722   | 31950722 | 31950747 | 7725  | GAGATGATGTTGCTGGACAGGATGC         | 52   | 58   | 25 | -3.6 | 27.6  | -0.17 |
| MHC_79_31958447   | 31958447 | 31958472 | 9224  | GGG ACC TTC ATC TGC GAG TAA GTC A | 52   | 58.1 | 25 | -3.6 | 28.1  | -0.25 |
| MHC_80_31967671   | 31967671 | 31967696 | 7133  | CCTTTGTGGATGAAACGGGCAGAAT         | 48   | 58   | 25 | -3.9 | 33    | -0.45 |
| MHC_81_31974804   | 31974804 | 31974829 | 7576  | CGCAGTTGCCAGAGTGTAAAGGAAA         | 48   | 58   | 25 | -5.1 | 33.2  | -0.58 |
| MHC_82_31982380   | 31982380 | 31982405 | 8719  | CCAAGTCTGCTCTGCTACCCTATGT         | 52   | 57.8 | 25 | -3.1 | 25    | 0.01  |
| MHC_83_31991099   | 31991099 | 31991124 | 7724  | GGTTTCATTGCTCACCTGGATGCTT         | 48   | 58   | 25 | -4.6 | 28.6  | -0.29 |
| MHC_84_31998823   | 31998823 | 31998848 | 6003  | AAACACGGTTACATTTGCTGGGCTT         | 44   | 58.1 | 25 | -3.9 | 25    | -0.03 |
| MHC_85b_32004826  | 32004826 | 32004851 | 10064 | CAGGTCACACATCACAAAGTCTGCAA        | 48   | 57.7 | 25 | -7   | 14.2  | 0.59  |
| MHC_86_32014891   | 32014891 | 32014915 | 7825  | ATGTTGAGGTTCCCAGGCTAAATGC         | 48   | 57.5 | 25 | -3.1 | 34.7  | -0.63 |
| MHC_87_32022716   | 32022716 | 32022740 | 8042  | GCAGCCTTCCCTCTTGATGACTTC          | 52   | 57.9 | 25 | -3.1 | 5.4   | 0.75  |
| MHC_88_32030757   | 32030757 | 32030782 | 8066  | CAAGGACTCAGGCAATCAACTCCAC         | 52   | 57.8 | 25 | -4.6 | 27.3  | -0.17 |
| MHC_89_32038823   | 32038823 | 32038848 | 8227  | CCCTTGAGTTTGCTGACTGGATTGG         | 52   | 58   | 25 | -3.1 | 28    | -0.17 |
| MHC_90_32047050   | 32047050 | 32047075 | 7556  | TATACTGCCTACCACGCTTTGCTCA         | 48   | 58.1 | 25 | -3.6 | 22.3  | 0.21  |
| MHC_91_32054606   | 32054606 | 32054631 | 5574  | CAGAGCATCTTACCCTGATACGCCT         | 52   | 58   | 25 | -3.6 | 25    | -0.04 |
| MHC_92_32060180   | 32060180 | 32060205 | 11000 | TTATTGTAACCCAGACCCTTGCTT          | 48   | 57.6 | 25 | -3.1 | 2.6   | 1.3   |
| MHC_93_32071180   | 32071180 | 32071205 | 7383  | AACCATGATCTACTTGCTCCGACA          | 48   | 57.8 | 25 | -5.4 | 32.2  | -0.55 |
| MHC_94r_32078563  | 32078563 | 32078588 | 7700  | TAG CGG GTC ATC TGG GAG GTT CTA G | 56   | 58.9 | 25 | -4.2 | 9.2   | 0.67  |
| MHC_95_32086263   | 32086263 | 32086288 | 6296  | GTAGTTGGTGTGGAGGACAAGGTCA         | 52   | 58   | 25 | -3.9 | 31.9  | -0.64 |
| MHC_96_32092559   | 32092559 | 32092584 | 9900  | ACGACAGGTACATCTATGGGAAGCC         | 52   | 58   | 25 | -3.6 | 30.1  | -0.38 |
| MHC_97r_32102459  | 32102459 | 32102484 | 8056  | TCA CCT TTG GTT TTG GAC AGG CTC A | 48   | 58.7 | 25 | -4.7 | 29.3  | -0.34 |
| MHC_98_32110515   | 32110515 | 32110540 | 8482  | GGCGAAGGTGGAATGAGAGGATCTA         | 52   | 57.7 | 25 | -4.6 | 38    | -0.61 |
| MHC_99_32118997   | 32118997 | 32119022 | 8064  | TGTAGTTGGTGTGGAGGACAAGGTC         | 52   | 58.1 | 25 | -3.9 | 26.4  | -0.11 |
| MHC_100_32127061  | 32127061 | 32127086 | 7563  | CGTTAGCCCCATTAGGACAGCAACT         | 52   | 58.1 | 25 | -3.6 | 39.5  | -0.77 |
| MHC_101_32134624  | 32134624 | 32134649 | 8544  | ATC ATT CAC CTC ACG GCT ACA CAA C | 48   | 57.4 | 25 | -3.6 | 28.4  | -0.15 |
| MHC_102b_32143169 | 32143169 | 32143193 | 5819  | AGAGCCACAAACCAGCCAGTGAAT          | 50   | 58.8 | 24 | -3.3 | 32.1  | -0.67 |
| MHC_103_32148987  | 32148987 | 32149012 | 9445  | GGACTCAGGATGTAAGCACTTCGC          | 52   | 58   | 25 | -3.6 | 32.9  | -0.42 |

|                   |          |          |       |                                   |      |      |    |      |        |       |
|-------------------|----------|----------|-------|-----------------------------------|------|------|----|------|--------|-------|
| MHC_104_32158432  | 32158432 | 32158457 | 8224  | CTTCCCAGTACAACCTCCACTGCTT         | 52   | 58.4 | 25 | -4.9 | 33.7   | -0.9  |
| MHC_105_32166656  | 32166656 | 32166681 | 8249  | CAATACACACACCTTGATGCTCCC          | 52   | 57.9 | 25 | -4.6 | 33.6   | -0.61 |
| MHC_106_32174907  | 32174907 | 32174930 | 7596  | GCCAATCCCTTCCCCAACACCTG           | 56.5 | 58.1 | 23 | -3.1 | -6     | 1.63  |
| MHC_107_32182501  | 32182501 | 32182526 | 8299  | CCTGGAGTGTAGCCTTGGGTAAGAG         | 56   | 58.1 | 25 | -3.5 | 33.8   | -0.66 |
| MHC_108_32190800  | 32190800 | 32190825 | 6118  | CGTATCCTCTAGTCTGTCACGCCAT         | 52   | 57.8 | 25 | -5   | 19.6   | 0.42  |
| MHC_109_32196918  | 32196918 | 32196943 | 8867  | GTGTCGAGGAGAAGGAGCTGAAGAA         | 52   | 58   | 25 | -6.7 | 7.5    | 0.66  |
| MHC_110_32205785  | 32205785 | 32205810 | 9730  | TCCACAATTCCTGCGGTTAAGGTA          | 48   | 58   | 25 | -5.3 | 28.4   | -0.32 |
| MHC_111_32215516  | 32215516 | 32215540 | 7243  | GATGTCCCACAGGAGATACTTGGC          | 54.2 | 56.8 | 24 | -5   | 37.5   | -1.07 |
| MHC_112_32222758  | 32222758 | 32222783 | 8295  | ATG GCA ACC AAT TAC CCA GAT CCC A | 48   | 58.2 | 25 | -5.4 | 26.7   | -0.08 |
| MHC_113_32231053  | 32231053 | 32231078 | 7737  | GTACCTGAGCCCTTCTTTCTGACT          | 52   | 57.7 | 25 | -3.6 | 17.2   | 0.5   |
| MHC_114_32238790  | 32238790 | 32238815 | 8005  | CTGTGACCACCTCATTGCTCCATA          | 52   | 58.3 | 25 | -3.5 | 26.4   | -0.05 |
| MHC_115r_32246795 | 32246795 | 32246820 | 8272  | AAACTACACCTCGTCGTAATCTGCG         | 48   | 58.2 | 25 | -3.6 | 28.6   | -0.34 |
| MHC_116_32255067  | 32255067 | 32255092 | 7704  | AAGGAGAGGGTTGAGTGTGTTGAGG         | 52   | 58.1 | 25 | -1.9 | -250   | 2.4   |
| MHC_117_32262771  | 32262771 | 32262796 | 10258 | ATTCCAACACACAGAAAGAGCAGGC         | 48   | 58   | 25 | -3.5 | 13.4   | 0.79  |
| MHC_118r_32273029 | 32273029 | 32273054 | 5994  | GTT AGC ACA CAC TGA GGT CCC TAC A | 52   | 58   | 25 | -4.6 | 20.5   | 0.27  |
| MHC_119_32279023  | 32279023 | 32279048 | 7417  | GGGAACAGGATACAGGAGGAGGACT         | 56   | 58.5 | 25 | -1.6 | 11.7   | 0.51  |
| MHC_120_32286440  | 32286440 | 32286465 | 8091  | TCACTACTGTCTCTCCCATCCAGCC         | 56   | 59   | 25 | -3.6 | 26.2   | -0.09 |
| MHC_121r_32294531 | 32294531 | 32294556 | 8535  | CTT TCT AAA CTG AGC GGC ACC CAA A | 48   | 58   | 25 | -3.9 | 16.8   | 0.53  |
| MHC_122r_32303066 | 32303066 | 32303091 | 4006  | CAG GAT AAA GCA AGA AGT GGG CAG G | 52   | 57.9 | 25 | -3.1 | 25     | 0.01  |
| MHC_123_32307072  | 32307072 | 32307097 | 9868  | ATAAGGGGTACACAGTTGGGTCTC          | 52   | 57.5 | 25 | -3.6 | 25     | 0.04  |
| MHC_124b_32316940 | 32316940 | 32316965 | 9596  | CCCTGCATTACTTTGACCACCAGA          | 52   | 58   | 25 | -7   | 25     | 0.04  |
| MHC_125b_32326898 | 32326898 | 32326923 | 3759  | GCCCAGGTAGAGAGTGAGAGTGAAA         | 52   | 57.5 | 25 | -3.1 | 7.8    | 1     |
| MHC_126r_32330295 | 32330295 | 32330320 | 12314 | AAA GCG GAG CTG ATG AAA GTG GAA C | 48   | 58   | 25 | -6.3 | 26.9   | -0.13 |
| MHC_127_32342609  | 32342609 | 32342634 | 2131  | AGAGAAGAACTGCCTTGTGATTGC          | 44   | 56.1 | 25 | -3.5 | 19.2   | 0.44  |
| MHC_128_32344740  | 32344740 | 32344765 | 15887 | GGCAAAGCACCTCATTAAACTTGGC         | 48   | 58   | 25 | -4.8 | 28.1   | -0.22 |
| MHC_129_32360627  | 32360627 | 32360652 | 5820  | GCTGGATTCTATACACACAGAACAA         | 40   | 53.2 | 25 | -5.1 | 33.9   | -0.82 |
| MHC_130_32366447  | 32366447 | 32366472 | 7915  | TAACATAGGCTTCCATACCTGCGGC         | 52   | 58.7 | 25 | -4.7 | 36.2   | -0.93 |
| MHC_131_32374362  | 32374362 | 32374387 | 8174  | TTTCAACTTCATCTCCCTGCCTTCC         | 48   | 57   | 25 | -3.1 | -1.3   | 1.45  |
| MHC_132_32382536  | 32382536 | 32382561 | 7706  | ACCTCCTGCCATCCTCAGTTTATCT         | 48   | 57   | 25 | -3.6 | 26.1   | -0.11 |
| MHC_133_32390242  | 32390242 | 32390267 | 8515  | GCTTCATTCTGGGTCTCAACCACT          | 48   | 57.2 | 25 | -5   | 43.7   | -1.73 |
| MHC_134_32398757  | 32398757 | 32398782 | 7501  | GGCAAGCAGGGTAATAAGGAAGCAA         | 48   | 57.6 | 25 | -3.1 | 27.2   | -0.24 |
| MHC_135_32406258  | 32406258 | 32406283 | 8157  | TAGGGCATTGAGACAGGGAACAGG          | 52   | 58.2 | 25 | -3.1 | 0.6    | 1.48  |
| MHC_136b_32414415 | 32414415 | 32414440 | 8478  | GCCACCATCAAGCCTCTTTCTTTGA         | 48   | 57.7 | 25 | -5.5 | 27.7   | -0.15 |
| MHC_137_32422894  | 32422894 | 32422919 | 7984  | AACCATGTCTTTACAGCCCTT             | 45.8 | 55.5 | 24 | -5.4 | 31.2   | -0.49 |
| MHC_138_32430877  | 32430877 | 32430902 | 9751  | ACCTAGAGAGTTGGTTGATGGTGCT         | 48   | 57.4 | 25 | -4.4 | 25     | -0.03 |
| MHC_139_32440629  | 32440629 | 32440654 | 6142  | GTTTGTGCCTACTTCCACAGGTGGG         | 54.2 | 57.9 | 24 | -5.2 | 33.9   | -0.9  |
| MHC_140_32446770  | 32446770 | 32446795 | 7515  | TAATAACACACCTCCAACCAGGGCA         | 48   | 57.9 | 25 | -4.7 | 33.1   | -0.72 |
| MHC_141_32454285  | 32454285 | 32454310 | 8184  | ACACCAATGTTTATCTATTCCCTGG         | 40   | 52.8 | 25 | -5   | 25     | -0.03 |
| MHC_142_32462469  | 32462469 | 32462494 | 8098  | GACCCCATCCTGAAAACCTTACCCT         | 52   | 57.9 | 25 | -2   | 9.2    | 0.67  |
| MHC_143_32470567  | 32470567 | 32470592 | 8466  | ACAGCGGAGATGTTTGTGACCCTTA         | 48   | 58.2 | 25 | -3.6 | 22     | 0.23  |
| MHC_144b_32479033 | 32479033 | 32479058 | 8008  | GAGATCCCAGTGACGTTGCTCACAG         | 56   | 59   | 25 | -3.1 | 28.9   | -0.22 |
| MHC_145_32487041  | 32487041 | 32487066 | 7841  | GTAACAGGTGGCAGCATTCCCTAA          | 48   | 57.3 | 25 | -4.7 | 19.8   | 0.3   |
| MHC_146_32494882  | 32494882 | 32494907 | 8260  | TGGTAAATCAAACGGAGAGGAGGCA         | 48   | 57.9 | 25 | -3.6 | 14.2   | 0.65  |
| MHC_147_32503142  | 32503142 | 32503167 | 7555  | GCCAGGAGTGTGGGTTTGTGTTAGTG        | 52   | 58.2 | 25 | -5   | 35.4   | -0.86 |
| MHC_148b_32510697 | 32510697 | 32510722 | 7599  | CTGAAGAGCCTACCAAACCTTGAC          | 56   | 59.3 | 25 | -6.3 | 35.9   | -0.75 |
| MHC_149_32518296  | 32518296 | 32518321 | 4043  | TGGATATGGCAAAGAAGGAGACGGT         | 48   | 57.8 | 25 | -3.9 | -354.5 | 1.37  |
| MHC_150_32522339  | 32522339 | 32522364 | 12827 | AGACAAGCATGGATTAAGAAAGCAA         | 36   | 53.5 | 25 | -5.4 | 27.7   | -0.24 |
| MHC_151_32535167  | 32535167 | 32535191 | 7777  | GGACAGTTTGTGACTAGCCTCCTC          | 54.2 | 56.7 | 24 | -4.6 | 33.3   | -0.54 |
| MHC_152_32542943  | 32542943 | 32542968 | 7959  | GGCTCAAGCTCCTACACCCTTCAT          | 52   | 58   | 25 | -6.3 | 38.8   | -1.1  |
| MHC_153_32550902  | 32550902 | 32550927 | 7778  | TCACATGCTACCACATAGGCACTCA         | 48   | 57.8 | 25 | -5.4 | 36.2   | -0.85 |
| MHC_154_32558680  | 32558680 | 32558705 | 6697  | GGA CAC ACT CGG CAT GTA ATT TGC T | 48   | 58   | 25 | -5.3 | 35.4   | -1.01 |

|                   |          |          |       |                                   |      |      |    |       |       |       |
|-------------------|----------|----------|-------|-----------------------------------|------|------|----|-------|-------|-------|
| MHC_155_32565377  | 32565377 | 32565402 | 13682 | CAGAGAATGCCGTCAAATGCAGACA         | 48   | 58.1 | 25 | -7    | 32.3  | -0.73 |
| MHC_156_32579063  | 32579063 | 32579084 | 8610  | tgcttttcctcCTCTGCTTCAG            | 50   | 57.2 | 22 | -3.55 | 26.2  | -0.09 |
| MHC_157b_32587669 | 32587669 | 32587694 | 3272  | CCTCACAATCTCCCTTTCTCAGGCA         | 52   | 58.2 | 25 | -4.7  | 29.4  | -0.21 |
| MHC_158_32590941  | 32590941 | 32590966 | 7453  | CCATCTTACAGAGCTAGTCATTCCCT        | 44   | 53.7 | 25 | -6.3  | 23.4  | 0.11  |
| MHC_159_32598394  | 32598394 | 32598419 | 7539  | AAACACGGGAAAACAGACCTCTCCA         | 48   | 58.3 | 25 | -4.6  | 30.6  | -0.46 |
| MHC_160_32605933  | 32605933 | 32605958 | 7576  | GAG GTT CCT ACA TGG CAA AGC TGA C | 52   | 58   | 25 | -6.3  | 30.2  | -0.26 |
| MHC_161_32613508  | 32613508 | 32613534 | 13669 | GCAAAAATAAGCACAACCAAGATGGC        | 42.3 | 56.6 | 26 | -5    | 37.1  | -0.83 |
| MHC_162_32627179  | 32627179 | 32627203 | 3512  | GTGCATCAGGCCACTCTACAAAG           | 54.2 | 57.8 | 24 | -9.3  | 38.3  | -0.85 |
| MHC_163_32630690  | 32630690 | 32630715 | 4226  | TGGGTCTTTGCGAGGATACAGTCA          | 48   | 58   | 25 | -7    | 19.3  | 0.37  |
| MHC_164_32634916  | 32634916 | 32634941 | 12063 | AAACCACGATCCCATGAATGTCCAC         | 48   | 57.6 | 25 | -5.3  | 22.3  | 0.18  |
| MHC_165_32646979  | 32646979 | 32647004 | 6158  | CTCTCTTTCCATAAACCTGATGTCT         | 40   | 52.4 | 25 | -3.9  | 19.6  | 0.52  |
| MHC_166b_32653138 | 32653138 | 32653162 | 7826  | CCCTACCCGGAAATCAATCTCTGTCT        | 52   | 60   | 25 | -9    | 35.5  | -0.59 |
| MHC_167b_32660963 | 32660963 | 32660988 | 11945 | AACTAGCAGCCCTTGCATTTCTGTC         | 48   | 57.8 | 25 | -7    | 17.1  | 0.52  |
| MHC_168_32672908  | 32672908 | 32672933 | 5754  | TGACATCTCTTCTACCCTGTGTGC          | 52   | 58   | 25 | -3.3  | 25    | -0.02 |
| MHC_169_32678662  | 32678662 | 32678687 | 7800  | CTCAAGAGGTCCCAGCAAGTAAT           | 48   | 56.6 | 25 | -3.6  | 25    | -0.02 |
| MHC_170_32686461  | 32686461 | 32686487 | 7727  | TGAGATCAGCAGGGTATCTAAAGTAA        | 38.5 | 53.1 | 26 | -4.6  | 29.8  | -0.36 |
| MHC_171_32694189  | 32694189 | 32694214 | 8945  | TTCTGGTCTCGCTCTTCTTCAGTC          | 52   | 58   | 25 | -3.6  | 24    | 0.07  |
| MHC_172b_32703134 | 32703134 | 32703159 | 7337  | AGTGCAAACACATTAAGATGCTGCT         | 40   | 56   | 25 | -7    | 33.1  | -0.85 |
| MHC_173_32710472  | 32710472 | 32710496 | 9203  | GACTCTCACCCATCACTCCTCACA          | 54.2 | 57.4 | 24 | -1.6  | -0.2  | 1.13  |
| MHC_174_32719674  | 32719674 | 32719699 | 8776  | AGTCTGCCTCACCTCCTGAATGAAG         | 52   | 58   | 25 | -3.5  | 21.1  | 0.22  |
| MHC_175b_32728450 | 32728450 | 32728475 | 6066  | AGTGGAAGCATAAAGTGGAGGGGAA         | 48   | 57.6 | 25 | -3.1  | 20.1  | 0.37  |
| MHC_176_32734516  | 32734516 | 32734541 | 7452  | GCTCCACAAGAAAACAACTGCCCT          | 52   | 59.8 | 25 | -3.1  | 26.7  | -0.14 |
| MHC_177_32741968  | 32741968 | 32741993 | 3569  | CATGCTCACTTTGTCTATCGCTGG          | 52   | 58   | 25 | -5.38 | 18.7  | 0.47  |
| MHC_178_32745537  | 32745537 | 32745562 | 15593 | CAACACACCTCTGCCTGTCTCTACT         | 52   | 58   | 25 | -3.3  | 22.2  | 0.24  |
| MHC_179_32761130  | 32761130 | 32761155 | 5108  | GCCCGCCTTTCTCCTATCCTTTAGA         | 52   | 57.9 | 25 | -3.6  | 28.8  | -0.33 |
| MHC_131_32766238  | 32766238 | 32766263 | 10118 | GGAGATGGGAAGGGTGGAGAAATGT         | 52   | 57.5 | 25 | -1.5  | -32.6 | 2.35  |
| MHC_132f_32776356 | 32776356 | 32776381 | 6175  | GGT CTG GAT TTG AGG GGT CAG GAT T | 52   | 58   | 25 | -3.6  | 29.5  | -0.4  |
| MHC_133_32782531  | 32782531 | 32782556 | 9759  | TATGGTAGGCAAGTGTGGTGGGT           | 48   | 58   | 25 | -3.9  | 32.6  | -0.7  |
| MHC_134_32792290  | 32792290 | 32792315 | 6433  | GCATGTGAAGAAGATCCACCTTGG          | 52   | 57.8 | 25 | -5.4  | 30.1  | -0.32 |
| MHC_135_32798723  | 32798723 | 32798748 | 8091  | GCCTTCTGTATATTTCTGCTTCCA          | 44   | 54.9 | 25 | -3.9  | 7.3   | 1.1   |
| MHC_136f_32806814 | 32806814 | 32806839 | 7657  | GGC TGA TGT CTT GGA GAT GGT CTG T | 52   | 58.3 | 25 | -3.2  | 17.2  | 0.44  |
| MHC_137_32814474  | 32814474 | 32814496 | 7782  | GAATCCACACAGAAGGAGACACC           | 52   | 57   | 23 | -4.6  | 30.1  | -0.31 |
| MHC_138_32822253  | 32822253 | 32822278 | 8358  | AAGTTGTAGGCGAATTGGGAAGTGG         | 48   | 57.5 | 25 | -5.4  | 1.9   | 0.96  |
| MHC_139f_32830611 | 32830611 | 32830636 | 7946  | ACC TGT TCA TTC CTG ATG ACA CCC T | 48   | 57.6 | 25 | -5    | 38.4  | -1.09 |
| MHC_140_32838557  | 32838557 | 32838582 | 9632  | TTCAGTCCACCATCAACTCAGGTCC         | 52   | 58.2 | 25 | -4.4  | 28.5  | -0.16 |
| MHC_141_32848189  | 32848189 | 32848214 | 4076  | CAAACCATACAATCCTCCCTGCC           | 52   | 57.8 | 25 | -3.1  | 0.9   | 1.36  |
| MHC_142_32852265  | 32852265 | 32852290 | 10411 | TAGAGACAGGGAAGCACAGGGATCT         | 52   | 58.2 | 25 | -4.6  | 11.1  | 1.02  |
| MHC_143_32862676  | 32862676 | 32862701 | 8271  | TCTTGGCACTATGAGACACTGGGAT         | 48   | 57.2 | 25 | -3.2  | 20.9  | 0.18  |
| MHC_144f_32870947 | 32870947 | 32870972 | 5993  | CTC TGG GCT ATG AAC TTG CTA CTG C | 52   | 57.5 | 25 | -3.1  | 32.6  | -0.52 |
| MHC_145_32876940  | 32876940 | 32876965 | 11776 | ATCGCAAATGCTGACATCCAAGGAA         | 44   | 57.6 | 25 | -5.1  | 36.1  | -0.89 |
| MHC_146_32888716  | 32888716 | 32888741 | 6873  | GGTCTCAGGGGAGTTTCTGGACAAT         | 52   | 58   | 25 | -3.5  | 35.1  | -0.95 |
| MHC_147_32895589  | 32895589 | 32895614 | 7392  | CTCCCCTACCAAGTCAACCAAGACA         | 52   | 58   | 25 | -2.9  | 37.9  | -1.23 |
| MHC_148_32902981  | 32902981 | 32903006 | 8088  | AAGGTAAGTCCCTCCAACAACCCAG         | 52   | 58.1 | 25 | -4.7  | 32.5  | -0.68 |
| MHC_149_32911069  | 32911069 | 32911094 | 7462  | TTACTCATCAGGGTGGTATCCGAGC         | 52   | 57.7 | 25 | -3.6  | 22.6  | 0.17  |
| MHC_150_32918531  | 32918531 | 32918556 | 7916  | TAAGGCACCTGGAAGAAGATGGAGC         | 52   | 58.3 | 25 | -4.7  | 30.6  | -0.39 |
| MHC_151_32926447  | 32926447 | 32926472 | 7621  | ACTCAGAACGGGTTGGGGATCAAAT         | 48   | 58.2 | 25 | -4.6  | 23.7  | 0.06  |
| MHC_152_32934068  | 32934068 | 32934093 | 8912  | AGTGGGAAGGAAGGGCTTGATGATT         | 48   | 58   | 25 | -3.5  | 27.8  | -0.18 |
| MHC_153_32942980  | 32942980 | 32943005 | 9651  | GGCAAAGGTGACAGAAGAAGCAACT         | 48   | 57.9 | 25 | -3.1  | 26.7  | -0.13 |
| MHC_154_32952631  | 32952631 | 32952656 | 6237  | CTACCTAAAATCCTACCGGACAGC          | 52   | 57.3 | 25 | -3.6  | 33.7  | -0.57 |
| MHC_155_32958868  | 32958868 | 32958893 | 7778  | CAATGTTGCTCTCACTCACCTTGGC         | 52   | 58.6 | 25 | -3.9  | 17.9  | 0.52  |
| MHC_156_32966645  | 32966645 | 32966671 | 6172  | TTCTTCACATAACAAGGGGTCCTGACA       | 46.2 | 57.4 | 26 | -4.7  | 32.6  | -0.59 |



|                   |          |          |       |                                   |      |      |    |       |       |       |
|-------------------|----------|----------|-------|-----------------------------------|------|------|----|-------|-------|-------|
| MHC_157r_32972818 | 32972818 | 32972843 | 11264 | GTA GAC CTG ACA TTG GGC ACT GAG A | 52   | 58   | 25 | -3.1  | 19.1  | 0.45  |
| MHC_158_32984082  | 32984082 | 32984107 | 6713  | CTGGTGAGGGAAAAGAAAGGTGGAC         | 52   | 57.4 | 25 | -1.6  | -1.7  | 1.31  |
| MHC_159_32990795  | 32990795 | 32990820 | 3685  | ATCCACACCTATGCTCGTTATATTG         | 40   | 52.9 | 25 | -3.9  | 19.9  | 0.25  |
| MHC_160_32994480  | 32994480 | 32994505 | 12331 | TTGGGCAACAGTCTCAATATGTAAC         | 40   | 53.6 | 25 | -3.9  | 21.7  | 0.17  |
| MHC_161_33006811  | 33006811 | 33006836 | 7922  | AGAAGTGAGTGTCTCCCAAACCTCC         | 52   | 57.9 | 25 | -4.5  | 36    | -1.18 |
| MHC_162_33014733  | 33014733 | 33014758 | 7755  | GGGAAGGGAGAACAGGTCAATGTCT         | 52   | 57.9 | 25 | -3.3  | 25    | -0.03 |
| MHC_163_33022488  | 33022488 | 33022513 | 8335  | GGAGTTGGACCTATGGAGTGGGTTA         | 52   | 57.2 | 25 | -4.4  | 30.7  | -0.43 |
| MHC_164_33030823  | 33030823 | 33030848 | 5815  | AGTCTCCCATTCTTCCCTGCTGCTAC        | 52   | 58.1 | 25 | -3.1  | -5.3  | 1.77  |
| MHC_165_33036638  | 33036638 | 33036663 | 10298 | TCAGAGAGCAAACCTAGCCATCCAG         | 52   | 58.1 | 25 | -4.2  | 23.4  | 0.09  |
| MHC_166_33046936  | 33046936 | 33046961 | 8547  | TGGAGTTTGAGGAAGAGGTGAGGTG         | 52   | 57.9 | 25 | -1.9  | 0.3   | 1.64  |
| MHC_167_33055483  | 33055483 | 33055508 | 7079  | CCACTCTGGGCAGGAAATAGGATCA         | 52   | 58   | 25 | -5    | 28.4  | -0.18 |
| MHC_168_33062562  | 33062562 | 33062587 | 6836  | GCTTTCCAACCAACCCCAAACCTCA         | 48   | 58.3 | 25 | -3.9  | -49.5 | 2.33  |
| MHC_169_33069398  | 33069398 | 33069423 | 9042  | TGCACGAAGAGAAAACCAGGCTAAGT        | 48   | 58   | 25 | -7    | 22.4  | 0.19  |
| MHC_170_33078439  | 33078439 | 33078465 | 8407  | GGTCTTCATCTTGTAGGTAATGGAGC        | 46.2 | 55.2 | 26 | -3.4  | 20.5  | 0.4   |
| MHC_171_33086847  | 33086847 | 33086872 | 8002  | TCTATGGCTTGGAGTGTGGTGAAC          | 48   | 57.6 | 25 | -3.1  | 25    | -0.01 |
| MHC_172_33094849  | 33094849 | 33094874 | 8013  | AGAAATAGCCTTCCATGAGGTTGCG         | 48   | 57.4 | 25 | -5.4  | 34.5  | -0.89 |
| MHC_173_33102862  | 33102862 | 33102887 | 10187 | ACAGTTGACATTGGGGTACTCAGAA         | 44   | 55.8 | 25 | -3.6  | 17.2  | 0.29  |
| MHC_174_33113049  | 33113049 | 33113074 | 1249  | GCAGCCCCAGATACCATTCTTTGTC         | 52   | 58   | 25 | -3.1  | 19.1  | 0.45  |
| MHC_175_33114298  | 33114298 | 33114323 | 9097  | ACTACTTCTCTGCCTCTCACTGGGT         | 52   | 58.4 | 25 | -3.1  | 22.3  | 0.17  |
| MHC_176_33126206  | 33123399 | 33123420 | 10423 | ccaccatgattcTGTCCCTAT             | 50   | 56   | 22 | -5.3  | 17.4  | 0.47  |
| MHC_177_33133818  | 33133818 | 33133843 | 10837 | AAATAAAGCAACACACCCCTGCCTG         | 48   | 58   | 25 | -5    | 32.2  | -0.55 |
| MHC_178_33144655  | 33144655 | 33144680 | 6434  | TGGATGTTAGGACGAGGAGGACT           | 52   | 58   | 25 | -3.6  | 11.5  | 0.63  |
| MHC_179_33151089  | 33151089 | 33151114 | 7820  | TACATGGTAGGGTAGGTGGTGTGTC         | 52   | 57.2 | 25 | -5.4  | 23.9  | 0.09  |
| MHC_180_33158909  | 33158909 | 33158934 | 5795  | TCACATTGAGGGAAGAGGCTGACAA         | 48   | 57.9 | 25 | -3.9  | 17.5  | 0.6   |
| MHC_181_33164704  | 33164704 | 33164729 | 6852  | ACAGTTCCCTAACGAGAAGGTGGTC         | 52   | 58   | 25 | -4.7  | 28.3  | -0.35 |
| MHC_182_33171557  | 33171557 | 33171581 | 11422 | GATTCCTGCCTCCATGAGCAAC            | 54.2 | 58.1 | 24 | -5.4  | 30.3  | -0.39 |
| MHC_183_33182978  | 33182978 | 33183003 | 8150  | GGAGAAGTGTGTGATGTCGCTGAAC         | 52   | 58.1 | 25 | -3.6  | 21.4  | 0.33  |
| MHC_184_33191128  | 33191128 | 33191153 | 9851  | AGTCTGGGATCTTGCCTTAGAGAT          | 48   | 56.5 | 25 | -4.6  | 27.3  | -0.17 |
| MHC_185_33200979  | 33200979 | 33201004 | 5604  | ACATGGGTTTAGGAAAGTTGCTGGC         | 48   | 58   | 25 | -5.4  | 14.6  | 0.72  |
| MHC_186_33206583  | 33206583 | 33206608 | 9897  | GACCACAGCATAACAGACCATCCAGT        | 52   | 58.3 | 25 | -3.1  | 7.4   | 1.02  |
| MHC_187_33216480  | 33216480 | 33216505 | 5387  | TGGAAGAGGAAGTGAGGCGAAATGA         | 48   | 57.9 | 25 | -3.6  | 8.3   | 0.57  |
| MHC_188_33221866  | 33221866 | 33221892 | 8341  | ACCAGATACCAATGCCAGAGGAAGAG        | 50   | 58   | 26 | -3.14 | 33    | -0.49 |
| MHC_189_33230208  | 33230208 | 33230233 | 7998  | CAAAGTGGTGGCAGGCATTTCTACA         | 48   | 58   | 25 | -3.9  | 16    | 0.54  |
| MHC_190r_33238206 | 33238206 | 33238231 | 8088  | GTC CCT ATG GCT CCA GTT TCT GAC A | 52   | 58   | 25 | -5    | 35.3  | -0.72 |
| MHC_191_33246294  | 33246294 | 33246319 | 8305  | AGTAGGGGTCACACTACCCATAGGA         | 52   | 57.9 | 25 | -4.4  | 31.9  | -0.59 |
| MHC_192r_33254599 | 33254599 | 33254624 | 7705  | GCT CAG TTG TTT CTT GGG GAT GAC C | 52   | 58   | 25 | -3.5  | 19.7  | 0.28  |
| MHC_193_33262304  | 33262304 | 33262329 | 8018  | CAACTAAGGAGGAGAGATGCCTGGG         | 56   | 58.1 | 25 | -4.7  | 31.2  | -0.44 |
| MHC_194_33270322  | 33270322 | 33270347 | 8291  | ACTTCTCACCCCATCAAGGTTCTGG         | 52   | 58.2 | 25 | -5    | 32.8  | -0.5  |
| MHC_195r_33278613 | 33278613 | 33278638 | 8278  | TCA GAG GCT TCC ATC ACC ACT TGT T | 48   | 58.1 | 25 | -3.1  | 34.6  | -0.59 |
| MHC_196_33286891  | 33286891 | 33286916 | 7498  | CCTTAACCAGTCTTCTACAGGCG           | 52   | 57.6 | 25 | -4.9  | 22.2  | 0.19  |
| MHC_197r_33294389 | 33294389 | 33294414 | 8944  | AAG ATG GAG GAA GCC TGG GAT GAA G | 52   | 58   | 25 | -4.7  | 26.4  | -0.09 |
| MHC_198_33303333  | 33303333 | 33303358 | 6845  | AAGGAGAGAAATGGGATGGGCGTTA         | 48   | 57.7 | 25 | -3.6  | 2.4   | 1.53  |
| MHC_199_33310178  | 33310178 | 33310203 | 8780  | TCAGGATCAAATCAAGGTACATGCG         | 44   | 55.5 | 25 | -5.4  | 30.3  | -0.39 |
| MHC_200r_33318958 | 33318958 | 33318983 | 7290  | TCT GAA TGT AAA GCT GGG AGA GGC A | 48   | 57.7 | 25 | -6.3  | 26.3  | -0.08 |
| MHC_201_33326248  | 33326248 | 33326273 | 8431  | TGAGTGAACCAGAGATTGAGGCAGT         | 48   | 57.6 | 25 | -3.1  | 26.7  | -0.12 |
| MHC_202_33334678  | 33334678 | 33334704 | 7562  | ATTGTATAGTTGTGGTGACGCTCCTC        | 46.2 | 56.8 | 26 | -3.6  | 34.1  | -0.7  |
| MHC_203_33342241  | 33342241 | 33342266 | 9629  | ATGACCCCACTATGCTGCTGATGAA         | 48   | 58   | 25 | -3.1  | 8     | 0.84  |
| MHC_204_33351870  | 33351870 | 33351895 | 6548  | ACAGAATTGGGCATAGGAGGTCAGG         | 52   | 58   | 25 | -5.3  | 25    | -0.03 |
| MHC_205_33358418  | 33358418 | 33358443 | 7818  | ATGGGCTGAAGATACAAGGACCAG          | 52   | 58.5 | 25 | -5    | 27.2  | -0.21 |
| MHC_206_33366236  | 33366236 | 33366261 | 8868  | ACCCTGTGATGCAAGTGAACCATTG         | 48   | 58   | 25 | -7    | 20.2  | 0.39  |
| MHC_207_33375104  | 33375104 | 33375129 | 6866  | CTCCCTACCACAACCCACGAATGTA         | 52   | 58   | 25 | -3.6  | 21.8  | 0.15  |

|                   |          |          |       |                                    |      |      |    |      |       |       |
|-------------------|----------|----------|-------|------------------------------------|------|------|----|------|-------|-------|
| MHC_208_33381970  | 33381970 | 33381995 | 8431  | AGCATACCCCAAGTCAACAGCATCT          | 48   | 58   | 25 | -3.1 | 26.3  | -0.05 |
| MHC_209_33390401  | 33390401 | 33390426 | 8732  | ACACAAACACAGACTTCAGGCACAG          | 48   | 57.9 | 25 | -3.1 | 2.7   | 1.02  |
| MHC_210_33399133  | 33399133 | 33399158 | 6997  | GTTTCAGGGAAGGGCAGAAGTCTCT          | 52   | 58.2 | 25 | -3.5 | 15.2  | 0.51  |
| MHC_211r_33406130 | 33406130 | 33406155 | 9294  | TTC AGT CCT TGC TCC TAC AAC CTC C  | 52   | 58   | 25 | -3.9 | 26.8  | -0.07 |
| MHC_212_33415424  | 33415424 | 33415449 | 5145  | AGACTGAAAATGGGGATGAGGGTGT          | 48   | 58   | 25 | -1.6 | 1.9   | 1.24  |
| MHC_213_33420569  | 33420569 | 33420594 | 12500 | CAGCCAGAGGAAACAAAACCACTT           | 48   | 57.8 | 25 | -3.1 | 27.5  | -0.2  |
| MHC_214_33433069  | 33433069 | 33433094 | 5534  | ACCCAATGTAGAGAAACGACGGTGA          | 48   | 58   | 25 | -4.4 | 14.3  | 0.43  |
| MHC_215_33438603  | 33438603 | 33438628 | 5631  | CCAATCTCCAGAAATCGTGCTGTC           | 52   | 58.2 | 25 | -3.6 | 27.5  | -0.21 |
| MHC_216_33444234  | 33444234 | 33444259 | 11946 | GGAAAGACAATCCCTCAAAGAGAAA          | 40   | 53.2 | 25 | -4.6 | 32.5  | -0.53 |
| MHC_217_33456180  | 33456180 | 33456205 | 6650  | TGCTTATACCCTGCACACCCTAAGT          | 48   | 57.5 | 25 | -7   | 32.1  | -0.6  |
| MHC_218r_33462829 | 33462829 | 33462855 | 9516  | TGT TGG TAA GCC ACT GTT TAT GAC CT | 42.3 | 56.5 | 26 | -5   | 37    | -0.89 |
| MHC_219_33472346  | 33472346 | 33472371 | 6755  | TGTCATCTGGTTCGCTAAGGTGGAT          | 48   | 57.8 | 25 | -3.6 | 17.2  | 0.62  |
| MHC_220_33479101  | 33479101 | 33479126 | 8456  | TGTTCCACAGCTATTGCCACAGGTA          | 48   | 58.2 | 25 | -6.3 | 35.1  | -0.68 |
| MHC_221_33487557  | 33487557 | 33487582 | 7349  | AGGTGTCTCAGGGATTTGGAGATGG          | 52   | 58   | 25 | -4.7 | 32.3  | -0.64 |
| MHC_222_33494906  | 33494906 | 33494931 | 7927  | TCAAGGTCTGAGGTCAATGGTCTGG          | 52   | 57.9 | 25 | -3.9 | 23.1  | 0.11  |
| MHC_223_33502833  | 33502833 | 33502858 | 8620  | ACATCTCTGTGAGGCAAAGTCAGGT          | 48   | 57.9 | 25 | -3.6 | 29    | -0.42 |
| MHC_224_33511453  | 33511453 | 33511478 | 7356  | GTTAAAGGAGGAGAGGCTTGGGGAA          | 52   | 58   | 25 | -0.8 | 20.7  | 0.25  |
| MHC_225_33518809  | 33518809 | 33518834 | 8371  | CCTGAGTGTCAACAAGAGTGTGTCC          | 52   | 58   | 25 | -3.5 | 34.9  | -0.55 |
| MHC_226r_33527180 | 33527180 | 33527205 | 7722  | TAA CCC TTC TCT GGC TTC ACC TGT G  | 52   | 58.2 | 25 | -3.3 | 36.9  | -0.8  |
| MHC_227_33534902  | 33534902 | 33534927 | 4228  | GGGTCAACCTGTCTTGGATCTGCTA          | 52   | 58   | 25 | -4.6 | 36.4  | -0.77 |
| MHC_228_33539129  | 33539129 | 33539155 | 10277 | AGGAGAGTAACAGAAAAGGAGGGCAT         | 46.2 | 57.3 | 26 | -3.1 | -13.9 | 2.14  |
| MHC_229_33549407  | 33549407 | 33549432 | 6134  | ACGGGAGAGGAGTTGAGGAGGTA            | 52   | 58.4 | 25 | -3.6 | -9.9  | 1.46  |
| MHC_230r_33555541 | 33555541 | 33555566 | 10775 | TTC TGT GTC AGT TCG CCA CAT TAC A  | 44   | 57   | 25 | -5.2 | 33.1  | -0.77 |
| MHC_231r_33566316 | 33566316 | 33566341 | 8457  | CAC CAT CGG CAT ACA CTC ATT GCT G  | 52   | 58.5 | 25 | -5.1 | 35.4  | -1.01 |
| MHC_232_33574773  | 33574773 | 33574798 | 8022  | TAGTTCAAGTCACCTTCCATGTCAA          | 40   | 54.1 | 25 | -5.4 | 16    | 0.46  |
| MHC_233r_33582795 | 33582795 | 33582820 | 8082  | GAG AAT CCA TGA AAG AGT GGT TTG T  | 40   | 53.6 | 25 | -5.4 | 30.3  | -0.52 |
| MHC_234_33590877  | 33590877 | 33590902 | 7007  | TCTGCTACACTAACCTTGCTCCTGT          | 48   | 57.4 | 25 | -3.3 | 26.2  | -0.09 |
| MHC_235_33597884  | 33597884 | 33597909 | 6809  | ACACGAGTACATCCTCACACACCTC          | 52   | 58   | 25 | -3.6 | 29.3  | -0.43 |
| MHC_236_33604693  | 33604693 | 33604718 | 9181  | GCCAAATCTGACCTTTCTTACGCT           | 48   | 58   | 25 | -3.9 | 19.5  | 0.34  |
| MHC_237_33613874  | 33613874 | 33613899 | 8348  | AACGGTGTGGAGGAGAAGTTGACAT          | 48   | 58.1 | 25 | -3.6 | 11.7  | 0.51  |
| MHC_238r_33622222 | 33622222 | 33622247 | 9585  | GGT CGT TCT CAG GGT TCT TGT TGT T  | 48   | 57.4 | 25 | -3.6 | 15.3  | 0.62  |
| MHC_239_33631810  | 33631810 | 33631835 | 8901  | CCA TGC CAG TCC TGT TTC CTG TT     | 52   | 59.7 | 23 | -5.3 | 26.3  | -0.07 |
| MHC_240_33640708  | 33640708 | 33640733 | 6035  | TCAGAGATTGTGCCCTCAAGTCATA          | 44   | 55.5 | 25 | -3.9 | 30.1  | -0.53 |
| MHC_241_33646743  | 33646743 | 33646768 | 7503  | ACGAACCCAGACGTATTTGGTGGAA          | 48   | 58.4 | 25 | -6.3 | 35.5  | -0.8  |
| MHC_242_33654246  | 33654246 | 33654271 | 8797  | TCAGAGTGTGTTCTTTCTCAGGGCA          | 48   | 57.8 | 25 | -3.2 | 32.7  | -0.8  |
| MHC_243_33663043  | 33663043 | 33663068 | 7799  | TCCACTCCAAACACACATAGGCTCA          | 48   | 57.9 | 25 | -3.1 | 9.9   | 0.8   |
| MHC_244r_33670842 | 33670842 | 33670867 | 5569  | CCT CTG CTC ATT CAG TCT AGT GCC A  | 52   | 58.1 | 25 | -4.2 | 29.3  | -0.43 |
| MHC_245_33676411  | 33676411 | 33676436 | 10719 | CGTTCCTTGTGACTGTGAAACCCAG          | 52   | 58.2 | 25 | -3.6 | 26.2  | -0.13 |
| MHC_246r_33687130 | 33687130 | 33687155 | 7527  | TCA GCC CTG TGA TCC TGT TGA GAA A  | 48   | 57.9 | 25 | -4.6 | 26.3  | -0.11 |
| MHC_247_33694657  | 33694657 | 33694682 | 7849  | TCTGTAGACTTCTGTGGGCAGTGAG          | 52   | 57.7 | 25 | -3.6 | 37.8  | -1.16 |
| MHC_248r_33702507 | 33702507 | 33702531 | 8278  | GAA TGC TAT CAG CGA GGG AAA GGC    | 54.2 | 58   | 24 | -4.7 | 35.3  | -0.83 |
| MHC_249_33710784  | 33710784 | 33710809 | 8061  | TCCATACCCCAAGTCAATGCTTTCT          | 48   | 58.1 | 25 | -3.4 | 15.9  | 0.53  |
| MHC_250_33718845  | 33718845 | 33718870 | 7164  | AGTCTGGCTTTCACTGTTTCCACT           | 48   | 58.3 | 25 | -5   | 21    | 0.32  |
| MHC_251_33726009  | 33726009 | 33726034 |       | TAGAAGCATGGGATGTGTATGGCGA          | 48   | 58   | 25 | -5.3 | 27.6  | -0.23 |

**Supplemental Table 1.** 500 capture, hybridization oligonucleotides designed using Anotholigo. The genomic position (HG19) of the hybridization oligos as well as the sequence and spacing between primers is provided in addition to other design criteria metrics including Dg, Tm, and GC%.

|              |                                                                                                                                                                                                        |
|--------------|--------------------------------------------------------------------------------------------------------------------------------------------------------------------------------------------------------|
| <b>MHC-1</b> | <p>Forward Primer<br/>5'-GAAAGACAGAGCAAGACCAATG-3'</p> <p>Reverse Primer<br/>5'-CAGCTAGGGATGGCAAGAG-3'</p> <p>Probe<br/>5'-/56-FAM/AGGACAATGACAGACGGGAAGGAG/3IABL FQ/-3'</p>                           |
| <b>MHC-2</b> | <p>Forward Primer<br/>5'-CCCTGCAAAACCTGTGTT-3'</p> <p>Reverse Primer<br/>5'-GTTCTTACTCCAAGGTCACG-3'</p> <p>Probe (reverse complement)<br/>5'-/56-FAM/TCACTTACACGGCTTCCCCATCC/3IABIk_FQ/-3'</p>         |
| <b>MHC-3</b> | <p>Forward Primer<br/>5'-TACCCCAAATCCCATCCA-3'</p> <p>Reverse Primer<br/>5'-CCCTGTAATTATCCCTGCCA-3'</p> <p>Probe<br/>5'-/56-FAM/TCTAGTGATTTCTCCCCAGTGCAAGC/3IABIk_FQ/-3'</p>                           |
| <b>MHC-4</b> | <p>Forward Primer<br/>5'-GGCCTCTAGGTTTCTGTCTT-3'</p> <p>Reverse Primer<br/>5'-CAGATCACAATGGGAGAAGG-3'</p> <p>Probe<br/>5'-/56-FAM/AGGCAGGATCATTAGCAACATGGGA/3IABIk_FQ/-3'</p>                          |
| <b>MHC-5</b> | <p>Forward Primer<br/>5'-CACAATTGACCCAGTTTGCA G-3'</p> <p>Reverse Primer<br/>5'-CCGATAACCTCTCCCTTGATTAC-3'</p> <p>Probe<br/>5'-/56-FAM/CCGACAGATGGCACTTACAGAACA/3IABL FQ/-3'</p>                       |
| <b>ACTB</b>  | <p>Forward Primer<br/>5'-CAGCGGAACCGCTCATTGGCAATGG-3'</p> <p>Reverse Primer<br/>5'-TCACCCACACTGTGCCCATCTACGC-3'</p> <p>Probe<br/>5'-/56-FAM/ATGCCCTCCCCATGCCATCC/3IABL FQ/-3'</p>                      |
| <b>EGFR</b>  | <p>Forward Primer<br/>5'-AGCATTGAAGAAAGTGCCAGTGTATTGATT-3'</p> <p>Reverse Primer<br/>5'-ATGGCCTCTGGCTTTGGATGTTG-3'</p> <p>Probe<br/>5'-/56-FAM/CATGGTTTGTGCTCTACCACCTGGT TACTGTGATTGC/3IABL FQ/-3'</p> |

|                |                                                                                                                                                                 |
|----------------|-----------------------------------------------------------------------------------------------------------------------------------------------------------------|
| <b>CLEC16A</b> | Forward Primer<br>5'-TCCAGCAGGTATTGTCCAC-3'<br>Reverse Primer<br>5'-CTGGAGGTCAGGGGTTTTGG-3'<br>Probe<br>5'-/56-FAM/ACATTTGGAGAACCCCGTGATCCC/3IABLQ/-3'          |
| <b>BRCA2</b>   | Forward Primer<br>5'-AAATAATATCCTTAATGATCAGGGCAT-3'<br>Reverse Primer<br>5'-AGAACTAAGGGTGGGTGGTG-3'<br>Probe<br>5'-/56-FAM/AAAGTCTAGGAGCTGAGGTGGATCC/3IABLQ/-3' |
| <b>CETP</b>    | Forward Primer<br>5'-TGGATACCATCTGATAGCGG-3'<br>Reverse Primer<br>5'-CCGTGGACACACTAACAGG-3'<br>Probe<br>5'-/56-FAM/TGTCTTCCATAAGCTGCTCCTGCA/3IABLQ/-3'          |
| <b>KCNJ2</b>   | Forward Primer<br>5'-GAAGACGGTATGAAGTTGGC-3'<br>Reverse Primer<br>5'-AAGCCAGGCAGAAGATAACC-3'<br>Probe<br>5'-/56-FAM/AGTAAAGTCCACACCCGACAACAGT/3IABLQ/-3'        |
| <b>KCNE1</b>   | Forward Primer<br>5'-TGTGGCAGGAGACAGTTCAG-3'<br>Reverse Primer<br>5'-CGATGTAGACGTTGAATGGG-3'<br>Probe<br>5'-/56-FAM/CTCTACGTCCTCATGGTACTGGGAT/3IABLQ/-3'        |
| <b>NOS3</b>    | Forward Primer<br>5'-CCTCTCAAGAAGGGCCTG-3'<br>Reverse Primer<br>5'-GTGCCGATCTCAGTGCTC-3'<br>Probe<br>5'-/56-FAM/GTGTCCAACATGCTGCTGGAAA/3IABLQ/-3'               |

**Supplemental Table 2.** List of qPCR primers and probe sequences designed to amplify regions within several genes (ACTB, EGFR, CLEC16A, BRCA2, CETP, KCNJ2, KCNE1, NOS3) as well as five MHC locations (MHC-1, MHC-2, MHC-3, MHC-4 and MHC-5 as indicated by arrows in Figure 5a).

| Variant Position<br>(HG19) | Primer Start Position |          | Primer Sequences                  |                                    |
|----------------------------|-----------------------|----------|-----------------------------------|------------------------------------|
|                            | Forward               | Reverse  | Forward 5'-3'                     | Reverse 5'-3'                      |
| 29642970                   | 29642636              | 29643047 | AGATCTTCAGCCAGCCAGG               | TGC TCT CCT AGT GTA CCT CTG TC     |
| 29782813                   | 29782654              | 29782899 | ATCAGCACGCAATTCCTCAACTCAC         | ATG ACC ATG TGG CCT GCT TAA AC     |
| 29873342                   | 29873156              | 29873489 | ACT AGG TTC CCT CAT CCT CTT GCT   | GCA TCT CCC ACC ATC AGT TCA GAC T  |
| 29881169                   | 29881045              | 29881547 | AAG AGG ATG CCA CCA GGG TTG       | AGC CTC CTA TGC ATG CCC AG         |
| 30064186                   | 30063819              | 30064228 | GGG AGG TGG ACA CCT TGG AAA TAA   | ATG AAT TAG TGG GAT TGG AGC ATG TG |
| 30298379                   | 30298174              | 30298511 | TGTAGGTGGACAGAGGTGGA              | GAG AGG TGA CAT TTG GGG TTG ACT G  |
| 30313566                   | 30313343              | 30313805 | CCA GAG ACG TGA GTG CTC CAA C     | ACCACTGGCATGAGTAAGTGAGCA           |
| 30314841                   | 30314757              | 30314968 | CTCACTCAGCAGCTTGCAATTTCCA         | CTT TGA GAC TGG GAA AAG ACC TGA G  |
| 30523754                   | 30523607              | 30523955 | CAG TCC TCC CAG ACA CCC TAT TTG G | CGA GGA AGA AGC CAT TCA GCG T      |
| 30720263                   | 30720127              | 30720333 | CCAAAGCAGTTGCCATAGGCTCTT          | ACT TGG TTC TGA GTC ACA CAT GGC    |
| 30889980                   | 30889806              | 30890156 | AAACGATAAGGAAGGGATGGCTGG          | TTG GGA TCT CTG GCC TCC ATA CTT    |
| 30917212                   | 30917008              | 30917284 | TTGCCTCAGACAAGCTCCTGACAA          | GTG TGG TAT TCT CAT TGG CTG TCA    |
| 30993958                   | 30993858              | 30994181 | CAG CAT CTA CTG CAG GTT CTG AGA   | ACTAGAGACTGTGGTGTCTCGGA            |
| 31097638                   | 31097168              | 31097655 | ACA ATG GGT TTC CCT CTG CAA       | GAG CCC CTG ATG TTG TCT AGG GA     |
| 31122977                   | 31122801              | 31123066 | AAG TCT GGC TGA GAT CGT GGA ACA   | TTT AAC TAG CAC CTG GCC TCA CC     |
| 31167845                   | 31167697              | 31167938 | CCA GTG CCC TTG GAG ACT AGT       | GGA GCA AAG ATG CTA CAG CAG GT     |
| 31193053                   | 31192946              | 31193148 | GGC TGC TCT CCA CAT TCT CCT AAA   | ACC CAA GAG CCT TCA GAC AGT CAA    |
| 31524014                   | 31523855              | 31524122 | GTA AAC CTC CCA TGC AAG CCT G     | TGC TGG AAA GTA CTG TTT ACC TGG C  |
| 31634758                   | 31634633              | 31634865 | TGGATTTCTGGTTCTGTGGGCT            | TATATTGCTGGACGGTGGCAGACT           |
| 31648132                   | 31648010              | 31648297 | GAA CCC TTG GAG CCA CTT ACC A     | GCC CTC AAG CAG GAT GTT ATG C      |
| 31648133                   | 31648010              | 31648297 | GAA CCC TTG GAG CCA CTT ACC A     | GCC CTC AAG CAG GAT GTT ATG C      |
| 31694325                   | 31694205              | 31694488 | TTTCCCTCCTTCACACTATCTGCC          | ATGACACTTCCAGGGACATTCA             |
| 31740352                   | 31740241              | 31740668 | TCT GTA TGC ACA CAG TAG AGG CTC   | TTC AAG GTA AGG GAT AGA CTG GGC    |
| 31740356                   | 31740241              | 31740668 | TCT GTA TGC ACA CAG TAG AGG CTC   | TTC AAG GTA AGG GAT AGA CTG GGC    |
| 31795949                   | 31795855              | 31796002 | CCTTCACGGACACCGAGCG               | CTCCGTCGTTGATCACCTGGA              |
| 31833072                   | 31832893              | 31833250 | GCC TGG CAA TGC TGA GAG TG        | AGC TAC ACT GCA AGC AAC CCT T      |
| 31870998                   | 31870930              | 31871114 | GAAGATGCCACTGTTTCCTGCCAA          | ACCACACCCTCCCTATTGCATGAT           |
| 31994782                   | 31961844              | 31962171 | TGTAGGAAGAGGGTCCAGTGATCT          | CCT GTA TGC TCA GGC TCC TAT G      |
| 32006858                   | 32006739              | 32006925 | ATCCAGGTCCCTGGAAGCTCT             | TGAGCTTCTGTGGGCTTTCCAGA            |
| 32054981                   | 32054796              | 32055042 | CTT GAC CTT AGG CAT CCA CAG GAT   | AGA CCT CCA AGT CCT ACG CCT T      |

|          |          |          |                                   |                                     |
|----------|----------|----------|-----------------------------------|-------------------------------------|
| 32312954 | 32312600 | 32313009 | ACT GTT AAG GAA ACT TGG AAG ACC T | GGG AGC ACA TAG GGA AAC TAA GG      |
| 32360309 | 32359988 | 32360427 | AACTGATCAGGCCAGGTGTG              | TGA GAT CCG GCC TAT CAA TCA CAA T   |
| 32360327 | 32359988 | 32360427 | AACTGATCAGGCCAGGTGTG              | TGA GAT CCG GCC TAT CAA TCA CAA T   |
| 32559516 | 32559413 | 32559580 | TGCAAGGATGCAAGGCTAGTAAACAG        | TCCCTCATTCTGGCTCCAATTA              |
| 32705528 | 32705421 | 32705954 | ATGGCATGTCAATTAGTGCTTTCTAA        | GCG AAC CTT GTT CTA TTT GCT TCT GT  |
| 32714960 | 32714786 | 32715143 | CCA GTA ACA CAG GAG CAA CCA AGT   | TCT CCT CAA GGT GAG AAG GGG A       |
| 32753753 | 32753641 | 32753888 | ACTCCTGCTCCAGTCATGCTTCTT          | AGG AAG ACA TTG ACA GCT GTA GGG     |
| 33039755 | 33039632 | 33039863 | GGG CTA TTG CAC TTA GAA GAC CTG   | TCT CCT GTT TAC CTG GAT CCT CCT     |
| 33081115 | 33080976 | 33081232 | AGG ATG GGT TGA AAC CTG TCA GAA G | ATGCAGAAAGGTGGAAGTCAGTGG            |
| 33134364 | 33134182 | 33134498 | GAG GAC TAT GCT TGT TAG GCT GGT   | CCT GGG CAG AAG GGT GAG AT          |
| 33147589 | 33147320 | 33147642 | CCAGCACTCTCCAAATTCACCCTT          | AAC GCT GGA GAA AGC CTC TGG         |
| 33171247 | 33171122 | 33171375 | AAG TCT GTG GAA AGG ACC TCT GAT C | ACT GCT CCT CCT TCA GTG AGA AG      |
| 33234563 | 33234360 | 33234703 | TGA CAG CAT GGA ACA GGT CGT GT    | TTGAGGTGGATGCAGGAGTAGCAA            |
| 33257396 | 33257271 | 33257511 | GCA GAA CTC CAC TCC CTA AAC ATG T | GCA CTC TTG AGA GGT AGC CCT G       |
| 33269394 | 33269008 | 33269528 | TCC TAG AGC TCC AAG AAG GTG AAT   | AAG CAG AGT GAG GGC ACT CA          |
| 33280795 | 33280654 | 33281009 | GCA TCA CCT GAC AAG TCT CTC AAG G | CTC AGC AGG AGC CTG TTC TCA         |
| 33289931 | 33289789 | 33290034 | CAG CAT AGC CCC ATC CCT TCA       | GGG AGG AAG AAT CAA CTT GCC AAC T   |
| 33383344 | 33383210 | 33383540 | ACTTCTTGGCCTAGACCGACTTCT          | GAAATGGGCAGAAATGGAGAGCAC            |
| 33457013 | 33456958 | 33457248 | GGGTGGCCTCCAGAGGTTCC              | TTA GTC AGG CAT GAT GGC ACG TAC CTG |
| 33457926 | 33456996 | 33458165 | AGT GTC ACT GTT AGT GAT GTT T     | CAG TCT TTA ACA GTG CTT TGA TA      |
| 33481405 | 33481165 | 33481506 | TTT GAG TGT GCA GCA GCC AG        | GGA TGA GGC TGT GCT ACA CCT         |
| 33505847 | 33505733 | 33506003 | GCG GGA AAA GAT TGC AAG GTA GTG   | TCAGGAAGCTGTGTCATAGCCTGT            |
| 33556608 | 33556401 | 33556721 | CCG AGC CTT TGG AGA ATG CTG G     | CAG AAA TGG GTG AAG GAA GAT GCC     |
| 33563140 | 33563034 | 33563397 | GAG AGT GGC CTG GTA AGA TGT ACA G | CCA TCC AGC AGG CGA TTC TCT         |
| 33583039 | 33582708 | 33583121 | GAT CCT TTC ACC AGT CTC TGG CC    | CTG TGT GGA ATT GAA CTG TCA GGG A   |
| 33583113 | 33582818 | 33583116 | TAGTGGGTGCTGGGAGATACCC            | GTG TGG AAT TGA ACT GTC AGG GAG A   |
| 33584003 | 33583949 | 33584268 | TTC CTG ACT TGG TCT GGA GAC ACA   | CGG AAA AGC CCT GCT CTA GAG T       |
| 33586057 | 33585876 | 33586121 | GCTAGAGGAAAGATACAGGCACTCA         | TGT GAA GGA AGT GTG AGC CAT CA      |
| 33586748 | 33586700 | 33586975 | TGAGGAGGCATAGGAAGGCTTCAA          | AAAGCACATGGCCTTGTTTCTCCC            |
| 33587065 | 33587007 | 33587336 | GAGACCCAAAGTGGAGTGACCTC           | GAC AGT TTC ACT TGC TCC CAG GAG     |
| 33587075 | 33586928 | 33587394 | TGGTGGAGAGACAGAGGCTCTAAG          | CTG AGC CAC AGC GAT GGG T           |
| 33587322 | 33587028 | 33587343 | TCC ATT CCT GGC TGC TAC ACC       | GGG ACA GTT TCA CTT GCT CCC A       |
| 33587824 | 33587399 | 33587838 | CCA TCG CTG TGG CTC AGT TG        | AGG GAA GGA CAC CTC CAG GAT         |

|          |          |          |                             |                                 |
|----------|----------|----------|-----------------------------|---------------------------------|
| 33590061 | 33589896 | 33590163 | TATTACCGATCCCGTGGTGCCTTT    | AGGGACGTGAACTGATTCCCTGTT        |
| 33590291 | 33590254 | 33590505 | TCAGAGGAGCAGCTGGATGTGATT    | GTC CAG CAT CAG TCC TGA GCT     |
| 33590471 | 33590254 | 33590505 | TCAGAGGAGCAGCTGGATGTGATT    | GTC CAG CAT CAG TCC TGA GCT     |
| 33592848 | 33592669 | 33592882 | AGAGCCTCCTGGAGAATTAGAGGT    | TGTTGGCCCTAATCAGCTACTCCA        |
| 33592881 | 33592753 | 33592964 | TCC AGG AGC GGT TGA GAC TG  | CTG ATG GGT CCA CCC TGT GT      |
| 33593577 | 33593401 | 33593691 | ACATTTGTCAAAGTGCCTCTGCC     | CCACCCAACAAGTTGGTGATGGAA        |
| 33595525 | 33595496 | 33595687 | CAG AAC TTG GTG CCA CAG AGG | AGTCTCAAGGTGGATGTGTGGCA         |
| 33595599 | 33595491 | 33595775 | AGGAACAGAACTTGGTGCCACAGA    | AGG GCA GAG TGT AAT CAA GTG GCT |
| 33596499 | 33596353 | 33596806 | TTCACAACACAGTGAGTCCAGGGT    | AGGGCCACCCAATGTAAGTGATCT        |
| 33596868 | 33596688 | 33597091 | AGCCCTCTTCTCCAGTATGAGTCT    | TCT GAC TAT GGA TTG GGC CCT G   |
| 33598456 | 33598285 | 33598647 | TCTTCCCAGCTTCCCTTTGGTCT     | TACCAAGAATCCACCCTGTGCCAA        |
| 33598613 | 33598525 | 33598750 | ACTATTTGGGTTCTCTGCGTGTGC    | AGAAACCCAGATTCAGTGGTTGGG        |
| 33598642 | 33598525 | 33598801 | ACTATTTGGGTTCTCTGCGTGTGC    | GCCCTTCTCCAGATAGCCAAAGT         |
| 33600895 | 33600717 | 33601042 | GGTTGTGTCTGTGCCATTCTCTGA    | AAGACCTGTTCCACCCTTTACCA         |
| 33607224 | 33607181 | 33607412 | ACCTTGTTAACCAACCCAGGGAGA    | TGTCAATGCCACTCCAGCCTCTAA        |
| 33608379 | 33608319 | 33608507 | AAGAAGTCCGTGGTAAGACCTCC     | AATGAAGGGAATGGCACGTCTGTG        |
| 33609965 | 33609862 | 33610089 | GAGTAATCAATGCATGCACAGGGC    | TCAACGCCCTCCCATTTCTGACT         |
| 33610350 | 33610244 | 33610487 | AAGCTTTGCATGTGTGTCGAGGTG    | GCCTCATTACAGGCTTTGGGAAA         |
| 33610705 | 33610555 | 33610838 | TGGGTCCATCCAGCAAAGTGATGT    | CTTGAGGCCAAGCTCCATCTTTGT        |
| 33617403 | 33617324 | 33617507 | AGACTGAATGACCTTCCATCCTC     | TGCTGCTCAATCAAGCACCAGAGT        |
| 33617464 | 33617407 | 33617877 | AGATGATTGGAAGCAGATGCAGGC    | CCACACAGGAGTTGCAGCATCAAA        |
| 33618162 | 33617952 | 33618258 | TGTGGTTTAGTGACAGGGAAGGCT    | ATGAGACACACTGCCCTGAAGCAT        |

**Table 3.** PCR primer location and sequences designed to validate high-confidence variant calls from NGS results.

| Region     | HG19 Position | Reference Sequence | NGS | Sanger           | Depth of coverage | Tm °C | Notes                                              |
|------------|---------------|--------------------|-----|------------------|-------------------|-------|----------------------------------------------------|
| Intron     | 29642970      | T                  | T/C | T/C ? POSSIBLE A | 80                | 57    | Sanger sequencing agrees with NGS                  |
| Intergenic | 29782813      | C                  | C/T | C/T              | 149               | 57    | Sanger sequencing agrees with NGS                  |
| Intergenic | 29873342      | A                  | A/C | A/G ?            | 203               | 53    | Sanger sequencing agrees with NGS (ref seq errors) |
| Intergenic | 29881169      | T                  | T/G | T                | 108               | 53    | Sanger agrees with reference sequence              |
| Intergenic | 30064186      | G                  | G/A | G                | 158               | 53    | Sanger agrees with reference sequence              |
| Intron     | 30298379      | A                  | A/G | A                | 204               | 53    | Sanger agrees with reference sequence              |
| Intron     | 30313566      | C                  | C/T | C                | 55                | 53    | Sanger agrees with reference sequence              |
| Intergenic | 30314841      | G                  | G/C | G                | 93                | 53    | Sanger agrees with reference sequence              |
| Intron     | 30523754      | A                  | A/G | A                | 60                | 53    | Sanger agrees with reference sequence              |
| Intergenic | 30720263      | C                  | C/T | C/T              | 107               | 57    | Sanger sequencing agrees with NGS                  |
| Exon       | 30889980      | T                  | T/C | T/C              | 165               | 57    | Sanger sequencing agrees with NGS                  |
| Exon       | 30917212      | T                  | T/C | T/C              | 158               | 57    | Sanger sequencing agrees with NGS                  |
| Exon       | 30993958      | A                  | A/G | A/G              | 110               | 57    | Sanger sequencing agrees with NGS                  |
| Intron     | 31097638      | A                  | A/G | A/G              | 159               | 57    | Sanger sequencing agrees with NGS                  |
| Intron     | 31122977      | C                  | C/T | C                | 38                | 57    | Sanger agrees with reference sequence              |
| Intron     | 31167845      | A                  | A/C | A                | 45                | 53    | Sanger agrees with reference sequence              |
| Intergenic | 31193053      | A                  | A/T | A                | 389               | 53    | Sanger agrees with reference sequence              |
| Intron     | 31524014      | A                  | A/C | A                | 77                | 53    | Sanger agrees with reference sequence              |
| Intron     | 31634758      | G                  | G/A | G/A              | 232               | 57    | Sanger sequencing agrees with NGS                  |
| Exon       | 31648132      | G                  | G/C | G                | 176               | 53    | Sanger agrees with reference sequence              |
| Exon       | 31648133      | G                  | G/C | G                | 183               | 53    | Sanger agrees with reference sequence              |
| Exon       | 31694325      | G                  | G/A | G/A              | 235               | 53    | Sanger sequencing agrees with NGS                  |
| Intron     | 31740352      | C                  | C/T | C                | 92                | 53    | Sanger agrees with reference sequence              |
| Intron     | 31740356      | C                  | C/T | C                | 88                | 53    | Sanger agrees with reference sequence              |
| Exon       | 31795949      | T                  | C?  | Y?               | 33                | 57    | Segmental duplication (software problems)          |
| Intron     | 31833072      | C                  | C/G | C                | 145               | 53    | Sanger agrees with reference sequence              |
| Intron     | 31870998      | A                  | A/T | A/T              | 43                | 57    | Sanger sequencing agrees with NGS                  |
| Exon       | 31994782      | C                  | C/T | Y                | 122               | 53    | Segmental duplication (software problems)          |
| Intron     | 32006858      | C                  | C/A | C/A              | 64                | 57    | Sanger sequencing agrees with NGS                  |
| Intron     | 32054981      | T                  | T/G | T                | 91                | 53    | Sanger agrees with reference sequence              |
| Intron     | 32312954      | C                  | C/T | C                | 77                | 53    | Sanger agrees with reference sequence              |
| Intron     | 32360309      | G                  | G/A | G                | 60                | 53    | Sanger agrees with reference sequence              |
| Intron     | 32360327      | G                  | G/A | G                | 46                | 53    | Sanger agrees with reference sequence              |
| Intergenic | 32559516      | C                  | T   | T                | 53                | 57    | Sanger sequencing agrees with NGS (ref seq errors) |
| Intergenic | 32705528      | C                  | C/T | C                | 119               | 53    | Sanger agrees with reference sequence              |
| Intergenic | 32714960      | C                  | C/A | C                | 76                | 53    | Sanger agrees with reference sequence              |
| Intergenic | 32753753      | T                  | T/G | T                | 137               | 53    | Sanger agrees with reference sequence              |
| Intron     | 33039755      | T                  | T/G | T                | 84                | 53    | Sanger agrees with reference sequence              |
| Intron     | 33081115      | T                  | T/G | T                | 221               | 53    | Sanger agrees with reference sequence              |
| Intron     | 33134364      | T                  | T/G | T                | 457               | 53    | Sanger agrees with reference sequence              |
| Intron     | 33147589      | T                  | T/G | T/G              | 227               | 57    | Sanger sequencing agrees with NGS                  |
| Intron     | 33171247      | A                  | A/C | A                | 101               | 53    | Sanger agrees with reference sequence              |
| Intron     | 33234563      | A                  | A/G | A                | 180               | 53    | Sanger agrees with reference sequence              |
| Exon       | 33257396      | A                  | A/T | A                | 98                | 53    | Sanger agrees with reference sequence              |



|            |          |   |     |   |     |    |                                                    |
|------------|----------|---|-----|---|-----|----|----------------------------------------------------|
| Exon       | 33269394 | G | G/A | G | 76  | 53 | Sanger agrees with reference sequence              |
| Intron     | 33280795 | G | G/T | G | 54  | 53 | Sanger agrees with reference sequence              |
| Intron     | 33289931 | T | T/G | T | 182 | 53 | Sanger agrees with reference sequence              |
| Intron     | 33383344 | G | G/A | G | 554 | 57 | Sanger agrees with reference sequence              |
| Intergenic | 33457013 | T | A   | A | 94  | 53 | Sanger sequencing agrees with NGS (ref seq errors) |
| Intergenic | 33457926 | T | C   | C | 58  | 53 | Sanger sequencing agrees with NGS (ref seq errors) |
| Intergenic | 33481405 | T | T/C | T | 40  | 53 | Sanger agrees with reference sequence              |
| Intergenic | 33505847 | A | A/G | A | 81  | 53 | Sanger agrees with reference sequence              |
| Intron     | 33556608 | A | A/G | A | 44  | 53 | Sanger agrees with reference sequence              |
| Intergenic | 33563140 | T | T/G | T | 318 | 53 | Sanger agrees with reference sequence              |
| Intergenic | 33583039 | G | A   | A | 82  | 57 | Sanger sequencing agrees with NGS (ref seq errors) |
| Intergenic | 33583113 | C | A   | A | 71  | 57 | Sanger sequencing agrees with NGS (ref seq errors) |
| Intergenic | 33584003 | T | C   | C | 91  | 57 | Sanger sequencing agrees with NGS (ref seq errors) |
| Intergenic | 33586057 | G | C   | C | 74  | 57 | Sanger sequencing agrees with NGS (ref seq errors) |
| Intergenic | 33586748 | T | C   | C | 67  | 57 | Sanger sequencing agrees with NGS (ref seq errors) |
| Intergenic | 33587065 | A | G   | G | 107 | 57 | Sanger sequencing agrees with NGS (ref seq errors) |
| Intergenic | 33587075 | T | C   | C | 104 | 57 | Sanger sequencing agrees with NGS (ref seq errors) |
| Intergenic | 33587322 | T | A   | A | 93  | 57 | Sanger sequencing agrees with NGS (ref seq errors) |
| Intergenic | 33587824 | C | G   | G | 116 | 57 | Sanger sequencing agrees with NGS (ref seq errors) |
| Intron     | 33590061 | C | T   | T | 57  | 57 | Sanger sequencing agrees with NGS (ref seq errors) |
| Intron     | 33590291 | C | T   | T | 46  | 57 | Sanger sequencing agrees with NGS (ref seq errors) |
| Intron     | 33590471 | T | C   | C | 83  | 57 | Sanger sequencing agrees with NGS (ref seq errors) |
| Intron     | 33592848 | C | G   | G | 46  | 57 | Sanger sequencing agrees with NGS (ref seq errors) |
| Intron     | 33592881 | A | C   | C | 40  | 57 | Sanger sequencing agrees with NGS (ref seq errors) |
| Intron     | 33593577 | C | A   | A | 64  | 57 | Sanger sequencing agrees with NGS (ref seq errors) |
| Intron     | 33595525 | T | C   | C | 95  | 57 | Sanger sequencing agrees with NGS (ref seq errors) |
| Intron     | 33595599 | T | C   | C | 76  | 57 | Sanger sequencing agrees with NGS (ref seq errors) |
| Intron     | 33596499 | C | G   | G | 56  | 57 | Sanger sequencing agrees with NGS (ref seq errors) |
| Intron     | 33596868 | C | T   | T | 83  | 57 | Sanger sequencing agrees with NGS (ref seq errors) |
| Intron     | 33598456 | C | G   | G | 42  | 57 | Sanger sequencing agrees with NGS (ref seq errors) |
| Intron     | 33598613 | T | C   | C | 50  | 57 | Sanger sequencing agrees with NGS (ref seq errors) |
| Intron     | 33598642 | G | A   | A | 46  | 57 | Sanger sequencing agrees with NGS (ref seq errors) |
| Intron     | 33600895 | C | A   | A | 32  | 57 | Sanger sequencing agrees with NGS (ref seq errors) |
| Intron     | 33607224 | G | A   | A | 173 | 57 | Sanger sequencing agrees with NGS (ref seq errors) |
| Intron     | 33608379 | T | C   | C | 177 | 57 | Sanger sequencing agrees with NGS (ref seq errors) |
| Intron     | 33609965 | C | T   | T | 86  | 57 | Sanger sequencing agrees with NGS (ref seq errors) |
| Intron     | 33610350 | A | G   | G | 163 | 57 | Sanger sequencing agrees with NGS (ref seq errors) |
| Intron     | 33610705 | A | G   | G | 75  | 57 | Sanger sequencing agrees with NGS (ref seq errors) |
| Intron     | 33617403 | T | C   | C | 65  | 57 | Sanger sequencing agrees with NGS (ref seq errors) |
| Intron     | 33617464 | C | T   | T | 59  | 57 | Sanger sequencing agrees with NGS (ref seq errors) |
| Intron     | 33618162 | A | T   | T | 41  | 57 | Sanger sequencing agrees with NGS (ref seq errors) |

**Supplemental Table 4.** Results of Sanger validation of high-confidence variants.

| <b>Capture Oligonucleotide Sequence (Primers)</b> |                                                                                                                                                                                                                                                                                                                                                                                                                               |
|---------------------------------------------------|-------------------------------------------------------------------------------------------------------------------------------------------------------------------------------------------------------------------------------------------------------------------------------------------------------------------------------------------------------------------------------------------------------------------------------|
| <b>EGFR</b>                                       | AGGGATGGGTCACAATGTTGAGGAC<br>CAACCAAGCATTGAAGGAGCAGGTC<br>CAGGGCCATCACCACACAAAGTGAAG<br>CCTGGTGACCAAGCACATCAGA<br>CCTGAGTGGAAGAAAGGTGGTTTAAAC<br>GAACACAGAGAAAGCCACCACCACG<br>CTTGGACGCTGCCAGGTGACTCTAA<br>GAGAGAAAGCCGTGGGGACTACAGA<br>GGCTGTGCTCTGCCATCGTACAAAT<br>TACAGACAGCTCCTCCACAAGGTGC                                                                                                                                |
| <b>KCNJ2</b>                                      | TGGGTGACCTTCACACTGTACCTC<br>CAGTGCCTTGAGGTGCAGTGAGAC<br>ACTTACTGACGTGGAGCAACGTG<br>GGTGACACCTCAGATAAGTCTAAACCT<br>CGAAAGATTGCAACTTTGGCTGCTA<br>GTGGGTTGATGCTGGAGCTAAATAG<br>GTGGCAGTGATGAGTCTGTGCATAA<br>GATATTCATGGTGAGTCCCCTCCGT<br>GGGACAGTGGTTAAAACAATGAGAGG<br>GTAGCAAGATTCAGGCAACTGGTAA                                                                                                                                 |
| <b>BRCA2</b>                                      | GTGAGTAAACAGGTGGATGTGTGAG<br>TCGGTCAGATACTGACGGTTGGGAT<br>AGTATGCCTTTAGGCTGTAGTGTGTC<br>CAGCTAATCACATGACTGCTCAATG<br>GCTAATAGATGCCTAAGCCCAGAAAG<br>CGCCAGTAGGCTTGCTCAACATAGT<br>GACTCTGAGCCTTCTGTGCTTAGT<br>CGGTTTGAAACTCTGTGTAGGAAT<br>CAGTCTGTCCCACCATGCTAAATTC<br>CTGCTTAGTCCTGCCTCATTCAAGA<br>GACAAAGGTGAGAGAGCATCCAGAT                                                                                                   |
| <b>CLEC16A</b>                                    | GGACAAGTCGCTTAATTTCTCAGA<br>CTTGTCTCCGCTCTGGGTTGG<br>TGAATTGATTTACCCGCCTG<br>CACAGATATGCAACCTAAGGCC<br>TGTGTTTCATGGGGTAAAATGGC<br>AGCTCAAAGTGCCAGGAGC<br>CACAGGAATTGGTTACTCAGGCA<br>GACAGCAGTTGCCAAGAGGG<br>CAACTTCTCAAGAGTCTGAGCTGC<br>CCAGCTGTGTGAAAGCAGAACC<br>AATGAGTGGTGTGTAAGGCAGCCGGA<br>TTTGGGGTACTCTGTGCCTCC<br>CCCAACAAATCTCTGGAAAACC<br>TGAATATGTTGCTGCCGTTTGACACC<br>TACGACTCATGGCCCCACAC<br>GGTAACCCTAGGCCCTGCTG |

**Supplemental Table 5.** 46 RSE primers designed to capture the four genes (~700kb in total) in order to examine the effect of RSE primer spacing on capture efficiency (Figure 3).
